# Supplementary material
Source: publisher figshare collection journal article supplement (https://sage.figshare.com/ndownloader/files/13380680)
Supplement: Supplementary file 1 [file 13380680]

## Appendices

### Appendix 1. Classification of Expansion and Non-Expansion States

Table A1. Classification of Expansion and Non-Expansion States

Table A2. Changes in Medicaid Eligibility Income Level for Childless Adults in Expansion States under the Affordable Care Act from 2011 through 2016

Table A3. Changes in Medicaid Eligibility Income Level for Childless Adults in non-Expansion States under the Affordable Care Act from 2011 through 2016

### Appendix 2. Outcome variables and Covariates

Table A4. Variable Specification and Questionnaire for Outcomes

Table A5. Variable Specification and Descriptive Statistics for Covariates

### Appendix 3. Effects of the ACA Medicaid Expansion on Access and Health Outcomes

Figure A1. Effects of the ACA Medicaid Expansion on Access Outcomes among All Poor Childless Adults, and for Whites, Blacks, and Hispanics

Figure A2. Effects of the ACA Medicaid Expansion on Health Outcomes among All Poor Childless Adults, and for Whites, Blacks, and Hispanics

### Appendix 4. Absolute Disparities and Relative Disparities

Table A6. Comparison between effects of the ACA Medicaid expansion on absolute disparities and relative disparities among poor childless Whites, Blacks, and Hispanics

### Appendix 5. Trends in Outcomes

Figure A3. Trends in Outcomes for All Poor Childless Adults between Expansion and Non-expansion states

3.1. Unadjusted Rates of Access Outcomes

3.2. Unadjusted Rates of Health Outcomes

Figure A4. Trends in Outcomes for Poor Childless Adults for Whites between Expansion and Non-expansion states

4.1. Unadjusted Rates of Access Outcomes

4.2. Unadjusted Rates of Health Outcomes

Figure A5. Trends in Outcomes for Poor Childless Adults for Blacks between Expansion and Non-expansion states

5.1. Unadjusted Rates of Access Outcomes

5.2. Unadjusted Rates of Health Outcomes

Figure A6. Trends in Outcomes for Poor Childless Adults for Hispanics between Expansion and Non-expansion states

6.1. Unadjusted Rates of Access Outcomes

6.2. Unadjusted Rates of Health Outcomes

### Appendix 6. Parallel Trend Assumption Test

Table A7. Parallel trends between treatment and control groups during pre-reform period for all poor childless adults

Table A8. Parallel trends between treatment and control groups during pre-reform period for poor childless adults for Whites

Table A9. Parallel trends between treatment and control groups during pre-reform period for poor childless adults for Blacks

Table A10. Parallel trends between treatment and control groups during pre-reform period for poor childless adults for Hispanics

### Appendix 7. Robustness Check

Table A11. Effects of ACA Medicaid expansion on outcomes for all poor childless adults

by covariate specification

Table A12. Effects of ACA Medicaid expansion on outcomes for poor White childless adults by covariate specification

Table A13. Effects of the ACA Medicaid expansion on outcomes for poor Black childless adults by covariate specification

Table A14. Effects of the ACA Medicaid expansion on outcomes for poor Hispanic childless adults by covariate specification

Table A15. Effects of the ACA Medicaid expansion on outcomes for poor childless adults by excluding states with prior-expansion or late expanders

Table A16. Effects of the ACA Medicaid expansion on the changes in outcomes for childless adults by income

Table A17. Comparison between stratified models with difference-in-difference-in-differences in estimated effects of the ACA Medicaid expansion on disparities in outcomes among poor childless Whites, Blacks, and Hispanics

#### Appendix 8. Falsification Test

Table A18. Effects of the ACA Medicaid expansion on the changes in outcomes for low-income childless elderly and high income childless adults

## Appendix 1. Classification of Expansion and Non-Expansion States

Table A1. Classification of Expansion and Non-Expansion States

| Expansion decision in 2014                 | Expansion States<br>(32 states including D.C)                                                                                                                                                                                                                                                              | Non-Expansion States<br>(19 states)                                                                                                                                                            |
|--------------------------------------------|------------------------------------------------------------------------------------------------------------------------------------------------------------------------------------------------------------------------------------------------------------------------------------------------------------|------------------------------------------------------------------------------------------------------------------------------------------------------------------------------------------------|
| <b>No early expansion</b>                  | Alaska <sup>1</sup> , Arizona, Arkansas, Illinois, Indiana <sup>1</sup> , Kentucky, Louisiana <sup>1</sup> , Maryland, Montana <sup>1</sup> , New Hampshire <sup>1</sup> , Nevada, New Mexico, Michigan <sup>1</sup> , North Dakota, Ohio, Oregon, Pennsylvania <sup>1</sup> , Rhode Island, West Virginia | Alabama, Florida, Georgia, Idaho, Kansas, Maine, Mississippi, Missouri, Nebraska, North Carolina, Oklahoma, South Carolina, South Dakota, Tennessee, Texas, Utah, Virginia, Wisconsin, Wyoming |
| <b>Full early expansion<sup>2</sup></b>    | Delaware, District of Columbia, Massachusetts, New York, Vermont                                                                                                                                                                                                                                           |                                                                                                                                                                                                |
| <b>Partial early expansion<sup>3</sup></b> | California, Connecticut, Hawaii, Minnesota                                                                                                                                                                                                                                                                 |                                                                                                                                                                                                |
| <b>Limited early expansion<sup>4</sup></b> | Colorado, Iowa, New Jersey, Washington                                                                                                                                                                                                                                                                     |                                                                                                                                                                                                |

Source: Authors created based on classification of expansion states by Kaestner et al. 2015; Dworsky & Eibner (2016).

Note. <sup>1</sup>Michigan (4/1/2014), New Hampshire (8/15/2014), Pennsylvania (1/1/2015), Indiana (2/1/2015), Alaska (9/1/2015), Montana (1/1/2016), Louisiana (7/1/2016) had adopted the Medicaid expansion later than January 2014. <sup>2</sup>Delaware, District of Columbia, Massachusetts, New York, and Vermont have provided childless adult with income at or above 100% FPL with full coverage equivalent with ACA Medicaid expansion before 2014. <sup>3</sup>California, Connecticut, Hawaii, and Minnesota have provided more limited coverage through 1115 waiver or ACA Medicaid coverage for childless adults with much lower income threshold before 2014. <sup>4</sup>Colorado, Iowa, New Jersey, Washington provided childless adults with a limited coverage.

Table A2. Changes in Medicaid Eligibility Income Level for Childless Adults in Expansion States under the Affordable Care Act from 2011 through 2016

| Year                                 | 2011                                    |           | 2012                 |           | 2013                 |                      | 2014     | 2015     | 2016     |
|--------------------------------------|-----------------------------------------|-----------|----------------------|-----------|----------------------|----------------------|----------|----------|----------|
| Program<br>\<br>State                | 1115<br>waiver<br>(Jobless/<br>working) | Medicaid  | 1115<br>waiver       | Medicaid  | 1115<br>waiver       | Medicaid             | Medicaid | Medicaid | Medicaid |
| Alaska <sup>1</sup>                  | N/A                                     | N/A       | N/A                  | N/A       | N/A                  | N/A                  | 0%       | 138%     | 138%     |
| Arizona <sup>2</sup>                 | 100/110<br>%                            | N/A       | 100/110%<br>(closed) | N/A       | N/A                  | 100/100%<br>(closed) | 138%     | 138%     | 138%     |
| Arkansas                             | NA/200<br>%                             | N/A       | NA/200%              | N/A       | NA/200%              | N/A                  | 138%     | 138%     | 138%     |
| California <sup>3</sup>              | 200/200<br>%                            | N/A       | 200/200%             | N/A       | 200/210%             | N/A                  | 138%     | 138%     | 138%     |
| Colorado <sup>5</sup>                | N/A                                     | N/A       | N/A                  | N/A       | N/A                  | 10%/20%<br>(closed)  | 138%     | 138%     | 138%     |
| Connecticut <sup>3</sup>             | N/A                                     | 56%/ 73%  | N/A                  | 56%/72%   | N/A                  | 55%/70%              | 138%     | 138%     | 138%     |
| Delaware <sup>4</sup>                | 100/110<br>%                            | N/A       | 100/110%             | N/A       | N/A                  | 100%/110%            | 138%     | 138%     | 138%     |
| District of<br>Columbia <sup>4</sup> | 200/211<br>%                            | 133%/144% | 200/211%             | 133%/144% | N/A                  | 200%/211%            | 215%     | 215%     | 215%     |
| Hawaii <sup>3</sup>                  | 200/200<br>%                            | N/A       | 200/200%             | N/A       | 133/133%             | N/A                  | 138%     | 138%     | 138%     |
| Illinois                             | N/A                                     | N/A       | N/A                  | N/A       | N/A                  | N/A                  | 138%     | 138%     | 138%     |
| Indiana <sup>1</sup>                 | 200/200<br>%<br>(closed)                | N/A       | 200/210%<br>(closed) | N/A       | 200/210%<br>(closed) | N/A                  | 0%       | 138%     | 139%     |
| Iowa <sup>5</sup>                    | 200/250<br>%                            | N/A       | 200/250%             | N/A       | 200/250%             | N/A                  | 138%     | 138%     | 138%     |
| Kentucky                             | N/A                                     | N/A       | N/A                  | N/A       | N/A                  | N/A                  | 138%     | 138%     | 138%     |
| Louisiana <sup>1</sup>               | N/A                                     | N/A       | N/A                  | N/A       | N/A                  | N/A                  | 0%       | 0%       | 0%       |
| Maryland                             | 116/128<br>%                            | N/A       | 116/128%             | N/A       | 116/128%             | N/A                  | 138%     | 138%     | 138%     |
| Massachusetts <sup>4,6</sup>         | 300/300<br>%                            | N/A       | 300/300%             | N/A       | 300/300%             | N/A                  | 138%     | 138%     | 138%     |
| Michigan                             | 35/45%<br>(closed)                      | N/A       | 35/45%<br>(closed)   | N/A       | 35/45%<br>(closed)   | N/A                  | 138%     | 138%     | 138%     |
| Minnesota <sup>5</sup>               | N/A                                     | N/A       | 250/250%             | 75%       | 200/200%             | 75%                  | 138%     | 138%     | 138%     |
| Montana <sup>1</sup>                 | N/A                                     | N/A       | N/A                  | N/A       | N/A                  | N/A                  | 0%       | 0%       | 138%     |
| Nevada                               | N/A                                     | N/A       | N/A                  | N/A       | N/A                  | N/A                  | 205%     | 138%     | 138%     |
| New Hampshire <sup>1</sup>           | N/A                                     | N/A       | N/A                  | N/A       | N/A                  | N/A                  | 138%     | 138%     | 138%     |
| New Jersey <sup>5</sup>              | N/A                                     | N/A       | 23/23%               | N/A       | 23/23%               | N/A                  | 138%     | 138%     | 138%     |
| New Mexico                           | 200/414<br>%<br>(closed)                | N/A       | 200/414%<br>(closed) | N/A       | 200/414%<br>(closed) | N/A                  | 138%     | 138%     | 138%     |
| New York <sup>4</sup>                | 100/100<br>%                            | N/A       | 100/100%             | N/A       | N/A                  | 100%                 | 138%     | 138%     | 138%     |
| North Dakota                         | N/A                                     | N/A       | N/A                  | N/A       | N/A                  | N/A                  | 138%     | 138%     | 138%     |
| Ohio                                 | N/A                                     | N/A       | N/A                  | N/A       | N/A                  | N/A                  | 138%     | 138%     | 138%     |
| Oregon                               | 201/201<br>%                            | N/A       | 201/201%             | N/A       | 100/201%<br>(closed) | N/A                  | 138%     | 138%     | 138%     |
| Pennsylvania <sup>1</sup>            | N/A                                     | N/A       | N/A                  | N/A       | N/A                  | N/A                  | 0%       | 138%     | 138%     |
| Rhode Island                         | N/A                                     | N/A       | N/A                  | N/A       | N/A                  | N/A                  | 138%     | 138%     | 138%     |
| Vermont <sup>4</sup>                 | 300/300<br>%                            | N/A       | 300/300%             | N/A       | 300/353%             | 150%/160%            | 138%     | 138%     | 138%     |
| Washington <sup>5</sup>              | N/A                                     | N/A       | 133/133%             | N/A       | 133/200%<br>(closed) | N/A                  | 138%     | 138%     | 138%     |
| West Virginia                        | N/A                                     | N/A       | N/A                  | N/A       | N/A                  | N/A                  | 138%     | 138%     | 138%     |

Source: Authors created based on “Findings from a 50-state survey of eligibility, enrollment, renewal, and cost-sharing policies in Medicaid and CHIP” from 2011 to 2016, Kaiser Commission on Medicaid and the Uninsured (Heberlein et al., 2011, 2012, 2013; Brooks et al., 2015, 2016). We did not include state-funded programs. Note. <sup>1</sup> Michigan (4/1/2014), New Hampshire (8/15/2014), Pennsylvania (1/1/2015), Indiana (2/1/2015), Alaska (9/1/2015), Montana (1/1/2016), and Louisiana (7/1/2016) had adopted the Medicaid expansion later than January 2014. <sup>2</sup> On July 8, 2011, Arizona closed enrollment for childless adults in its waiver coverage (Heberlein et al., 2012). <sup>3</sup> California, Connecticut, Hawaii, and Minnesota have

provided more limited coverage through 1115 waiver or ACA Medicaid coverage for childless adults with much lower income threshold before 2014. California covers childless adults with income up to 200% FPL through the Medicaid Coverage Expansion (MCE) and the Health Care Coverage Initiative (HCCI) with more limited benefits than full Medicaid. Connecticut provides Medicaid to childless adults with income up to about 73 %FPL through the State Administered General Assistance (SAGA) as of April 2010 and overall expansion (Husky D) as of June 2013 (Sommers, Kenney, and Epstein, 2014). Hawaii had provided more limited coverage through the QUEST -ACE waiver program to childless adult with income up to 200% FPL and reduced eligibility to 133% FPL in 2013. Minnesota provides childless adults up to 75% FPL as of March 2011 (Heberlein et al., 2012).<sup>4</sup> Delaware, District of Columbia, Massachusetts, New York, and Vermont have provided childless adult with income at or above 100% FPL with full coverage equivalent with ACA Medicaid expansion before 2014.<sup>5</sup> Colorado, Iowa, New Jersey, and Washington provided childless adults with a limited coverage. Colorado provided Medicaid to 10,000 of adults with income up to 10 and 20 % of FPL through a waiver (Heberlein et al., 2013). Iowa covered adults with income up to 250 % FPL with more limited coverage through the IowaCare waiver program (Heberlein et al., 2011, 2012, 2013). New Jersey expanded Medicaid to childless adults up to 23 % FPL through a waiver since April 2011 (Heberlein et al., 2012). With limited coverage, Washington covered childless adults up to 200% FPL through state funded Basic Health program until 2011 and began to cover childless 133 % FPL under the section 1115 waiver in 2012 (Heberlein et al., 2012).<sup>6</sup> In 2006, Massachusetts created the Commonwealth Care Health Insurance Program (Commonwealth Care) to provide subsidies for adults up to 300% FPL who are ineligible for MassHealth and established an individual mandate required all adults to purchase health insurance.

Table A3. Changes in Medicaid Eligibility Income Level for Childless Adults in non-Expansion States under the Affordable Care Act from 2011 through 2016

| Childless                    | 2011                                    |          | 2012                 |          | 2013                 |          | 2014     | 2015     | 2016     |
|------------------------------|-----------------------------------------|----------|----------------------|----------|----------------------|----------|----------|----------|----------|
| Program<br>\<br>State        | 1115<br>waiver<br>(Jobless/<br>working) | Medicaid | 1115<br>waiver       | Medicaid | 1115<br>waiver       | Medicaid | Medicaid | Medicaid | Medicaid |
| <b>Alabama</b>               | N/A                                     | N/A      | N/A                  | N/A      | N/A                  | N/A      | 0%       | 0%       | 0%       |
| <b>Florida</b>               | N/A                                     | N/A      | N/A                  | N/A      | N/A                  | N/A      | 0%       | 0%       | 0%       |
| <b>Georgia</b>               | N/A                                     | N/A      | N/A                  | N/A      | N/A                  | N/A      | 0%       | 0%       | 0%       |
| <b>Idaho</b>                 | N/A/185%                                | N/A      | N/A/185%             | N/A      | N/A/185%             | N/A      | 0%       | 0%       | 0%       |
| <b>Kansas</b>                | N/A                                     | N/A      | N/A                  | N/A      | N/A                  | N/A      | 0%       | 0%       | 0%       |
| <b>Maine<sup>1</sup></b>     | 100%<br>(closed)                        | N/A      | 100%<br>(closed)     | N/A      | 100%<br>(closed)     | N/A      | 0%       | 0%       | 0%       |
| <b>Mississippi</b>           | N/A                                     | N/A      | N/A                  | N/A      | N/A                  | N/A      | 0%       | 0%       | 0%       |
| <b>Missouri</b>              | N/A                                     | N/A      | N/A                  | N/A      | N/A                  | N/A      | 0%       | 0%       | 0%       |
| <b>Nebraska</b>              | N/A                                     | N/A      | N/A                  | N/A      | N/A                  | N/A      | 0%       | 0%       | 0%       |
| <b>North Carolina</b>        | N/A                                     | N/A      | N/A                  | N/A      | N/A                  | N/A      | 0%       | 0%       | 0%       |
| <b>Oklahoma</b>              | 200/200%                                | N/A      | 200/200%             | N/A      | N/A/200%             | N/A      | 0%       | 0%       | 0%       |
| <b>South Carolina</b>        | N/A                                     | N/A      | N/A                  | N/A      | N/A                  | N/A      | 0%       | 0%       | 0%       |
| <b>South Dakota</b>          | N/A                                     | N/A      | N/A                  | N/A      | N/A                  | N/A      | 0%       | 0%       | 0%       |
| <b>Tennessee</b>             | N/A                                     | N/A      | N/A                  | N/A      | N/A                  | N/A      | 0%       | 0%       | 0%       |
| <b>Texas</b>                 | N/A                                     | N/A      | N/A                  | N/A      | N/A                  | N/A      | 0%       | 0%       | 0%       |
| <b>Utah</b>                  | 150(closed<br>)150%                     | N/A      | 150(closed<br>)150%  | N/A      | 150(closed<br>)200%  | N/A      | 0%       | 0%       | 0%       |
| <b>Virginia</b>              | N/A                                     | N/A      | N/A                  | N/A      | N/A                  | N/A      | 0%       | 0%       | 0%       |
| <b>Wisconsin<sup>2</sup></b> | 200/200%<br>(closed)                    | N/A      | 200/200%<br>(closed) | N/A      | 200/200%<br>(closed) | N/A      | 100%     | 100%     | 100%     |
| <b>Wyoming</b>               | N/A                                     | N/A      | N/A                  | N/A      | N/A                  | N/A      | 0%       | 0%       | 0%       |

Source: Authors created based on “Findings from a 50-state survey of eligibility, enrollment, renewal, and cost-sharing policies in Medicaid and CHIP” from 2011 to 2016, Kaiser Commission on Medicaid and the Uninsured. (Heberlein et al., 2011, 2012, 2013; Brooks et al., 2015, 2016). Note. 1. Maine provide childless adults with income up to 100% FPL with more limited coverage under the MaineCare waiver program but enrollment is closed (Heberlein et al., 2011). 2. Simon et al. (2017) classified Wisconsin as an expansion state since Wisconsin provides childless adults with income up to 100% FPL through the BadgerCare program. Studies using adults with income 138% FPL defined Wisconsin as a non-expansion state because Wisconsin opted out the Medicaid expansion under the ACA. However, in 2014, Wisconsin began to provide childless adults with income 100% FPL with more comprehensive benefits to childless adults compared to the previous waiver program (the BadgerCare Plus Core Plan) through the BadgerCare Plus Standard Plan. Since we use same with 100% FPL, we classified Wisconsin as an expansion state.

## Appendix 2. Outcome variables and Covariates

Table A4. Variable Specification and Questionnaire for Outcomes

| Outcomes                                     | Coding                                                         | Questionnaire                                                                                                                                                                                    |
|----------------------------------------------|----------------------------------------------------------------|--------------------------------------------------------------------------------------------------------------------------------------------------------------------------------------------------|
| No insurance                                 | 1=yes;<br>0=no                                                 | Do you have any kind of health care coverage, including health insurance, prepaid plans such as HMOs, or government plans such as Medicare?                                                      |
| No usual Source of care                      | 1=yes (only one/<br>more than one);<br>0=no                    | Do you have one person you think of as your personal doctor or health care provider?                                                                                                             |
| Unmet care needs due to cost                 | 1=yes;<br>0=no                                                 | Was there a time in the past 12 months when you needed to see a doctor but could not because of the cost?                                                                                        |
| No annual check-up                           | 1=check-up within a year<br>0=No annual check-up within a year | About how long has it been since you last visited a doctor for a routine check-up? [A routine check-up is a general physical exam, not an exam for a specific injury, illness, or condition.]    |
| Fair or poor health status                   | 1=fair or poor<br>0=excellent/very good/good                   | Would you say that in general your health is excellent/ very good/ good/ fair/ poor?                                                                                                             |
| Poor physical health days                    | Number of days                                                 | Now thinking about your physical health, which includes physical illness and injury, for how many days during the past 30 days was your physical health not good? (physical health)              |
| Poor mental health days                      | Numbers of days                                                | Now thinking about your mental health, which includes stress, depression, and problems with emotions, for how many days during the past 30 days was your mental health not good? (mental health) |
| Days with health-related activity limitation | Number of days                                                 | During the past 30 days, for about how many days did poor physical or mental health keep you from doing your usual activities, such as self-care, work, or recreation? (functional limitation)   |

Note. Authors coded all the outcomes negatively for convenience of interpretation. Respondents answered “don’t know/not sure”, refused, not asked or missing are coded as missing.

Table A5. Variable Specification and Descriptive Statistics for Covariates

|                               | Expansion States |                | Non-expansion States |                 | Pre-Difference <sup>1</sup> | Coding                                                                                                                                                            |
|-------------------------------|------------------|----------------|----------------------|-----------------|-----------------------------|-------------------------------------------------------------------------------------------------------------------------------------------------------------------|
|                               | Pre              | Post           | Pre                  | Post            |                             |                                                                                                                                                                   |
| <b>Observation</b>            | 29,787           | 22,119         | 19,078               | 16,301          |                             | N =87,285                                                                                                                                                         |
| <b>Age, mean (SD)</b>         | 41.01<br>(14.79) | 41.52<br>(0.2) | 42.41<br>(14.5)      | 42.8<br>(14.84) | -1.40***                    | Number of years                                                                                                                                                   |
| <b>Female</b>                 | 0.46<br>(0.5)    | 0.46<br>(0.01) | 0.46<br>(0.5)        | 0.48<br>(0.5)   | 0.00                        | 1 = female; 0 = male                                                                                                                                              |
| <b>White</b>                  | 0.5<br>(0.5)     | 0.46<br>(0.01) | 0.52<br>(0.5)        | 0.48<br>(0.5)   | -0.02                       | 1 = yes; 0 = no                                                                                                                                                   |
| <b>Black</b>                  | 0.18<br>(0.38)   | 0.14<br>(0)    | 0.23<br>(0.42)       | 0.24<br>(0.42)  | -0.05***                    | 1 = yes; 0 = no                                                                                                                                                   |
| <b>Hispanic</b>               | 0.21<br>(0.41)   | 0.28<br>(0.01) | 0.18<br>(0.39)       | 0.22<br>(0.41)  | 0.03***                     | 1 = yes; 0 = no                                                                                                                                                   |
| <b>Others</b>                 | 0.11<br>(0.31)   | 0.13<br>(0)    | 0.07<br>(0.25)       | 0.07<br>(0.25)  | 0.04***                     | 1 = non-Hispanic other race or multiracial                                                                                                                        |
| <b>High school degree</b>     | 0.6<br>(0.49)    | 0.6<br>(0.01)  | 0.64<br>(0.48)       | 0.64<br>(0.48)  | -0.04***                    | 1=Never attended school, Grade 1 through 12 (High school graduate);<br>0 = High school graduate, some college or technical school, college graduate               |
| <b>Married</b>                | 0.15<br>(0.36)   | 0.19<br>(0.01) | 0.19<br>(0.39)       | 0.22<br>(0.41)  | -0.04***                    | 1 = married<br>0 = divorced, widowed, separated, never married, or member of an unmarried couple                                                                  |
| <b>Self-employed</b>          | 0.07<br>(0.26)   | 0.07<br>(0)    | 0.07<br>(0.26)       | 0.07<br>(0.25)  | 0.00                        | 1 = yes; 0 = no                                                                                                                                                   |
| <b>Employed for wage</b>      | 0.23<br>(0.42)   | 0.26<br>(0.01) | 0.23<br>(0.42)       | 0.24<br>(0.43)  | 0.00                        | 1 = yes; 0 = no                                                                                                                                                   |
| <b>Unemployed</b>             | 0.7<br>(0.46)    | 0.66<br>(0.01) | 0.7<br>(0.46)        | 0.69<br>(0.46)  | 0.00                        | 1 = out of work for more than 1 year or less than 1 year, homemaker, student, retired, or unable to work;<br>0 = no                                               |
| <b>Chronic disease status</b> | 0.6<br>(0.49)    | 0.6<br>(0.01)  | 0.64<br>(0.48)       | 0.64<br>(0.48)  | -0.04***                    | 1 = heart attack, angina or coronary heart disease, stroke, asthma, skin cancer, cancer, COPD, arthritis, depressive disorder, kidney disease, diabetes<br>0 = no |

|                                          | Expansion States      |                     | Non-expansion States  |                       | Pre-Difference <sup>1</sup> | Coding                                                                   |
|------------------------------------------|-----------------------|---------------------|-----------------------|-----------------------|-----------------------------|--------------------------------------------------------------------------|
|                                          | Pre                   | Post                | Pre                   | Post                  |                             |                                                                          |
| Observation                              | 29,787                | 22,119              | 19,078                | 16,301                |                             | N =87,285                                                                |
| Tobacco use                              | 0.52<br>(0.5)         | 0.48<br>(0.01)      | 0.54<br>(0.5)         | 0.51<br>(0.5)         | -0.02***                    | 1 = have smoked at least 100 cigarettes in entire life;<br>0 = no        |
| Hospital beds per 1,000 population       | 17.48<br>(7.82)       | 16.44<br>(0.1)      | 17.96<br>(6.85)       | 17.46<br>(6.58)       | -0.48***                    | Annual number of hospital beds per 1,000 population by state             |
| Physicians per 1,000 population          | 0.78<br>(0.09)        | 0.8<br>(0)          | 0.67<br>(0.08)        | 0.68<br>(0.08)        | 0.11***                     | Annual number of physicians per 1,000 population by state                |
| Unemployment rate                        | 4.15<br>(0.82)        | 2.82<br>(0.01)      | 3.75<br>(0.7)         | 2.53<br>(0.37)        | 0.40***                     | Annual unemployment rate by state                                        |
| Per capita income                        | 45342.43<br>(6358.25) | 51030.61<br>(73.19) | 39998.48<br>(3826.91) | 43382.67<br>(3912.93) | 5343.95***                  | Annual per capita income by state                                        |
| Percent of White population              | 62.04<br>(16.96)      | 58.85<br>(0.22)     | 61.96<br>(12.35)      | 60.05<br>(12.42)      | 0.08                        | Annual percent of White population by state                              |
| Percent of Black population              | 10.39<br>(7.58)       | 9.26<br>(0.06)      | 16.94<br>(8.64)       | 17.39<br>(8.57)       | -6.55***                    | Annual percent of Black population by state                              |
| Percent of Hispanic population           | 17.97<br>(13.77)      | 20.79<br>(0.18)     | 15.83<br>(12.71)      | 16.93<br>(13.16)      | 2.14***                     | Annual percent of Hispanic population by state                           |
| Congressional voting record <sup>2</sup> | 73.04<br>(29.27)      | 71.66<br>(0.29)     | 25.85<br>(23.08)      | 20.45<br>(23.8)       | 47.19***                    | ADA scores on congressional voting records of each member of the Senate. |

Note. The means were weighted by BRFSS final survey weights. Standard deviation is in parentheses. <sup>1</sup>Difference of pre-Medicaid expansion between expansion and non-expansion states. <sup>2</sup> Legislator's ideology rating is measured by the Americans for Democratic Action (ADA) scores on congressional voting records on a wide range of legislative issues for each U.S. senator from each state (Kitchener et al., 2003). Each state rating was produced by averaging senator's ratings for each state. COPD=chronic obstructive pulmonary disease, emphysema or chronic bronchitis. ADA=Americans for Democratic Action. \*\*\*p<0.01; \*\*p<0.05; \*p<0.1. Respondents answered "don't know/not sure", refused, not asked or missing are dropped from the sample.

### Appendix 3. Effects of the ACA Medicaid Expansion on Access and Health Outcomes

Figure A1. Effects of the ACA Medicaid Expansion on Access Outcomes among All Poor Childless Adults, and for Whites, Blacks, and Hispanics

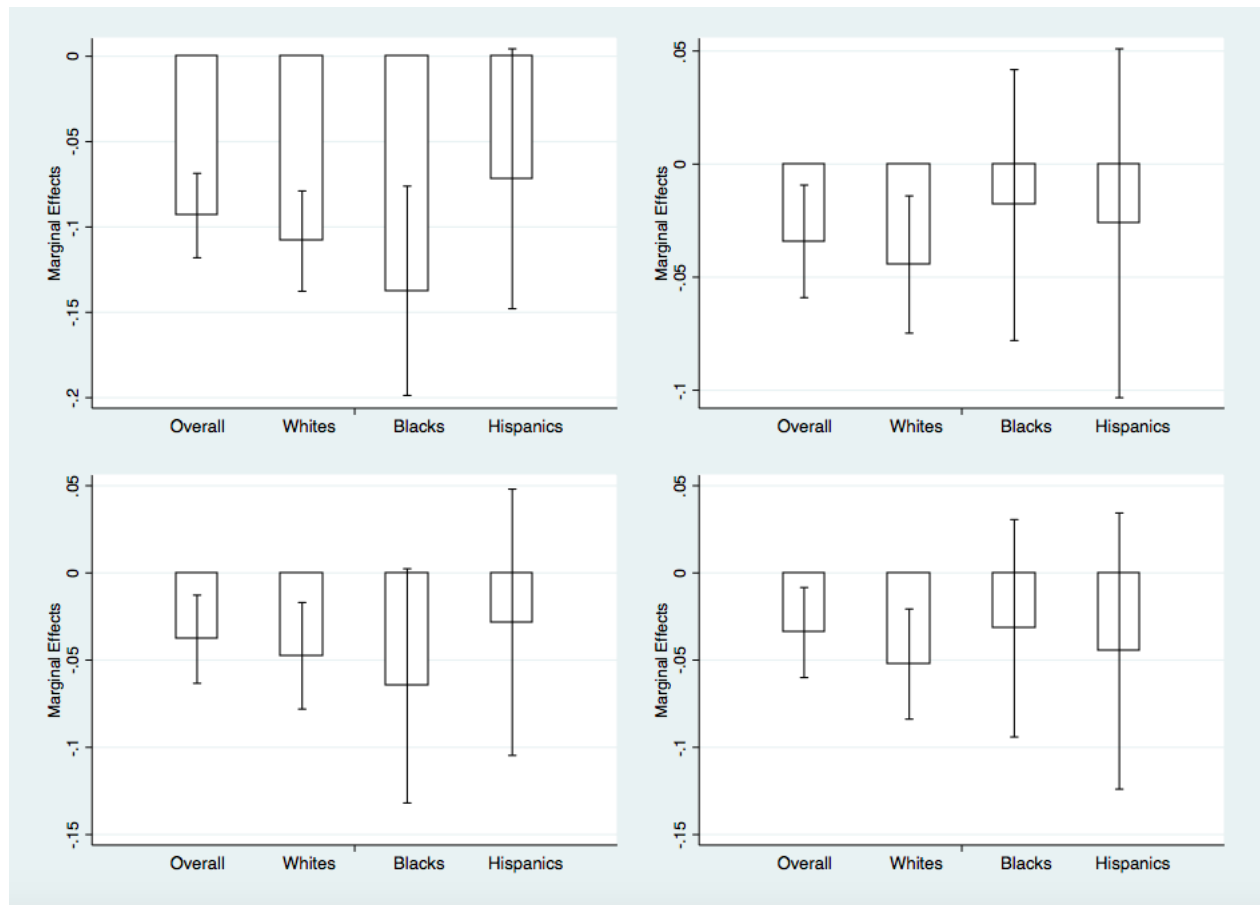

Note. Bars show the effects of Medicaid expansion on access outcomes (Uninsured, No usual source of care, Unmet care needs due to cost, and No annual check-up) for each racial/ethnic subgroup. These results were obtained from difference in differences models. See Table 3.

Figure A2. Effects of the ACA Medicaid Expansion on Health Outcomes among All Poor Childless Adults, and for Whites, Blacks, and Hispanics

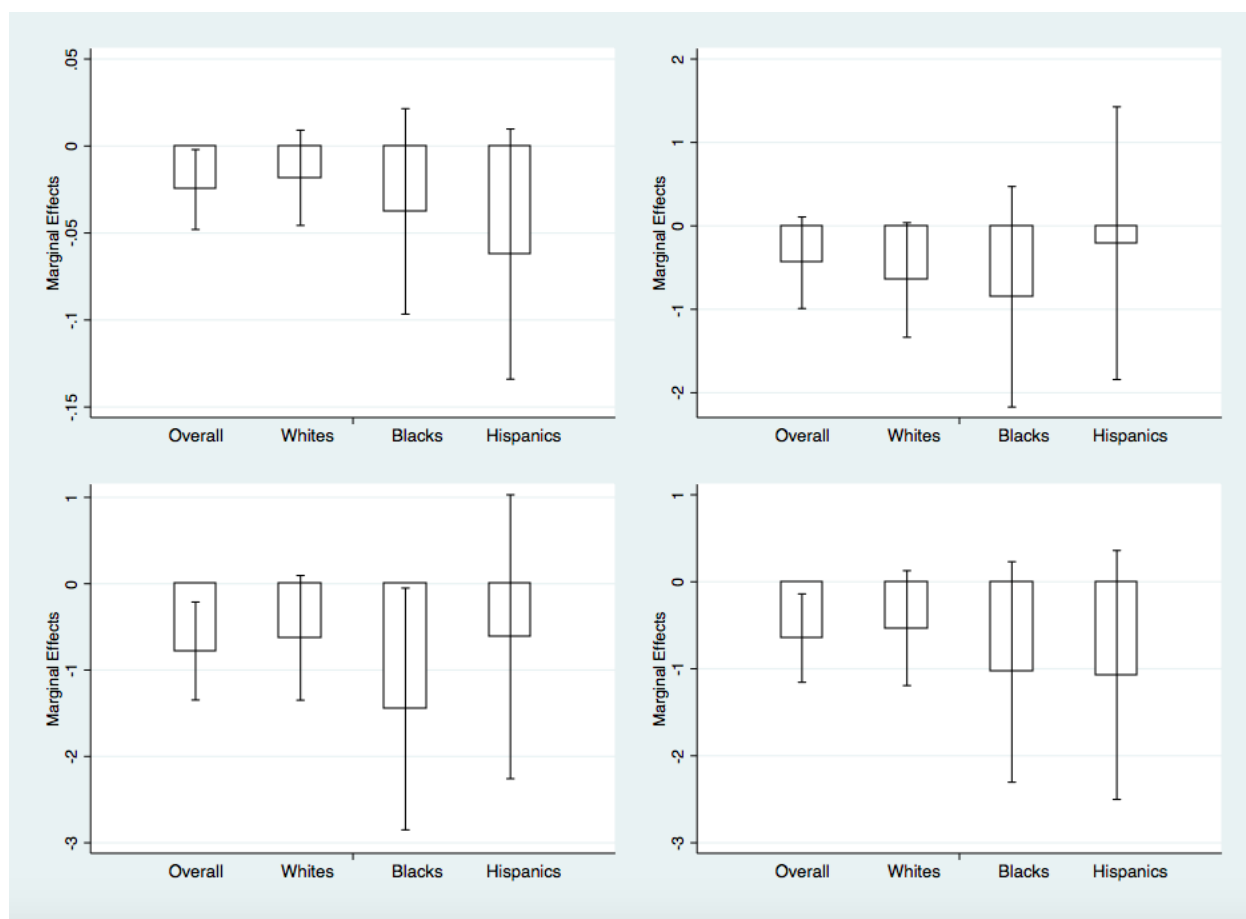

Note. Bars show the effects of Medicaid expansion on health outcomes (Fair or poor health status, Poor physical health days, Poor mental health days, and Days with health-related activity limitation) for each racial/ethnic subgroup. These results were obtained from difference in differences models. See Table 3.

#### Appendix 4. Absolute Disparities and Relative Disparities

The changes in relative disparities are manually calculated using following formula:

$$\frac{r_H + \Delta r_H}{r_W + \Delta r_W} - \frac{r_H}{r_W}.$$

where,  $r_H$  is the outcome for Hispanics (minorities),  $r_W$  is the outcome for Whites (reference group).  $\Delta r_H$  and  $\Delta r_W$  are changes in outcomes after the expansion for Hispanics and Whites, respectively.

The first term,  $\frac{r_H + \Delta r_H}{r_W + \Delta r_W}$ , is the relative disparities between Hispanics and Whites

after the expansion and the second term,  $\frac{r_H}{r_W}$ , is the relative disparities before the expansion. The

changes in Black-White relative disparities are calculated in a same way. Statistical significance

of the difference in relative disparities between pre- and post-ACA is estimated using *suest* and

*lincom* command in Stata.

Table A6. Comparison between effects of the ACA Medicaid expansion on absolute disparities and relative disparities among poor childless Whites, Blacks, and Hispanics

|                                                 |                      | Insurance      | Access to Care          |                              |                    |                            | Health Status             |                         |                                              |
|-------------------------------------------------|----------------------|----------------|-------------------------|------------------------------|--------------------|----------------------------|---------------------------|-------------------------|----------------------------------------------|
|                                                 |                      | No insurance   | No usual Source of care | Unmet care needs due to cost | No annual check-up | Fair or poor health status | Poor physical health days | Poor mental health days | Days with health-related activity limitation |
| Change in the Absolute Disparities <sup>1</sup> | Blacks-Whites (1)    | -0.029 (0.038) | 0.026 (0.022)           | -0.017 (0.035)               | 0.021 (0.04)       | -0.019 (0.041)             | -0.201 (0.612)            | -0.824 (0.599)          | -0.504 (0.499)                               |
|                                                 | Hispanics-Whites (2) | 0.037 (0.037)  | 0.018 (0.027)           | 0.019 (0.027)                | 0.007 (0.043)      | -0.044* (0.027)            | 0.441 (0.668)             | 0.013 (1.005)           | -0.538 (0.911)                               |
| Change in the Relative Disparities <sup>2</sup> | Blacks/Whites (3)    | 0.34* (0.199)  | 0.146 (1.31)            | 0.073 (0.092)                | 0.024 (0.111)      | -0.112 (0.075)             | 0.041 (0.081)             | -0.017 (0.111)          | -0.096 (0.126)                               |
|                                                 | Hispanics/Whites (4) | -0.083 (0.157) | 0.114 (1.37)            | -0.048 (0.117)               | 0.018 (0.098)      | -0.053 (0.114)             | -0.038 (0.074)            | -0.110* (0.066)         | -0.078 (0.07)                                |
| Sample size (overall)                           |                      | 86,808         | 86,865                  | 86,918                       | 85,769             | 86,821                     | 84,727                    | 84,974                  | 85,314                                       |

Notes: Panel 1 to 4 displays marginal effects and standard errors are in parentheses. The estimated changes in absolute disparities (Panel 1 and 2) are from panel 5 and 6 in Table 3. The changes in relative disparities are manually calculated by subtracting the ratio of Blacks (or Hispanics) to Whites before expansion from the ratio after expansion ( $\frac{r_B + \Delta r_B}{r_W + \Delta r_W} - \frac{r_B}{r_W}$ ). All regressions control for age, gender, race, education, marital status, employment status, chronic diseases status, tobacco use, state-fixed effects, and quarter/year-fixed effects. We also control for state-year variables including the number of hospital beds and physicians per 1,000 population, unemployment rate, per capita income, racial/ethnic composition, and Senate voting records. \*\*\*p<0.01; \*\*p<0.05; \*p<0.1. <sup>1</sup>Absolute racial/ethnic disparities are simple differences in outcomes between minorities and a reference group. <sup>2</sup>Relative racial/ethnic disparities are measured as the ratio of each minority group to Whites as the reference group.

## Appendix 5. Trends in Outcomes

Figure A3. Trends in Outcomes for All Poor Childless Adults between Expansion and Non-expansion states

### 3.1. Unadjusted Rates of Access Outcomes

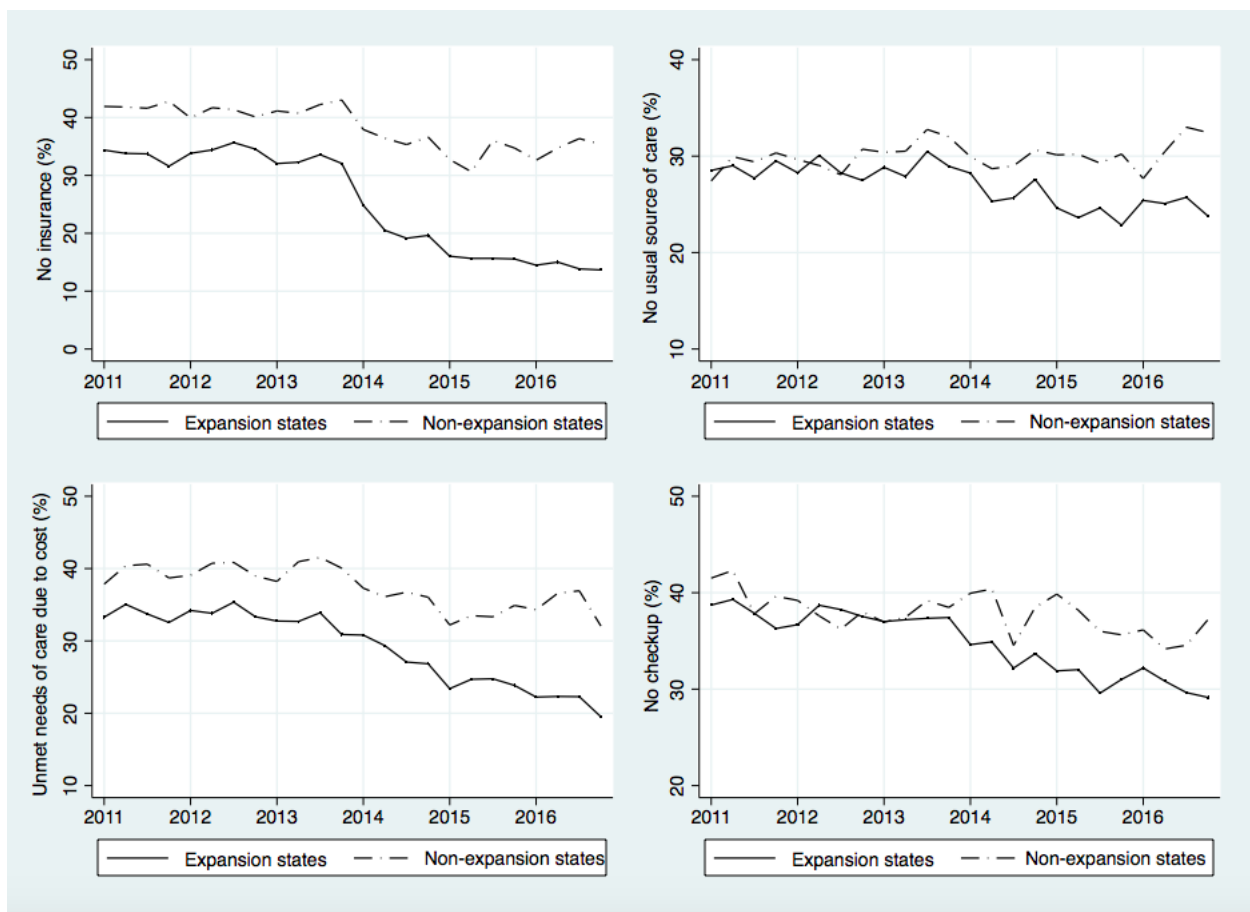

Note. Figures show the quarterly trends of the unadjusted rates of the access outcomes (Uninsured, No usual source of care, Unmet care needs due to cost, and No annual check-up) for all childless adults aged 19 to 64 with income below 100 % of the FPL.

### 3.2. Unadjusted Rates of Health Outcomes

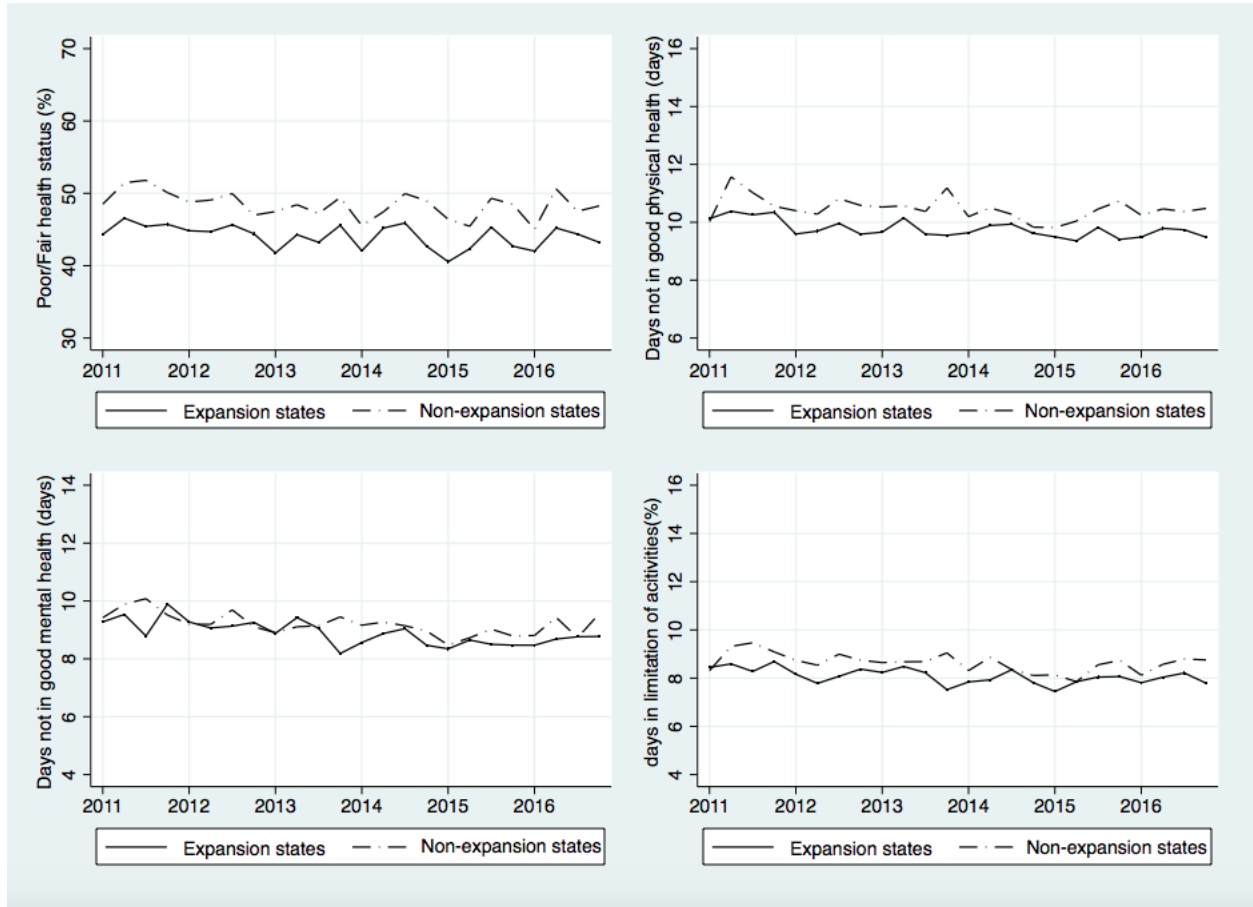

Note. Figures show the quarterly trends of the unadjusted rates of the health outcomes (Fair or poor health status, Poor physical health days, Poor mental health days, and Days with health-related activity limitation) for all childless adults aged 19 to 64 with income below 100 % of the FPL.

Figure A4. Trends in Outcomes for Poor Childless Adults for Whites between Expansion and Non-expansion states

#### 4.1. Unadjusted Rates of Access Outcomes

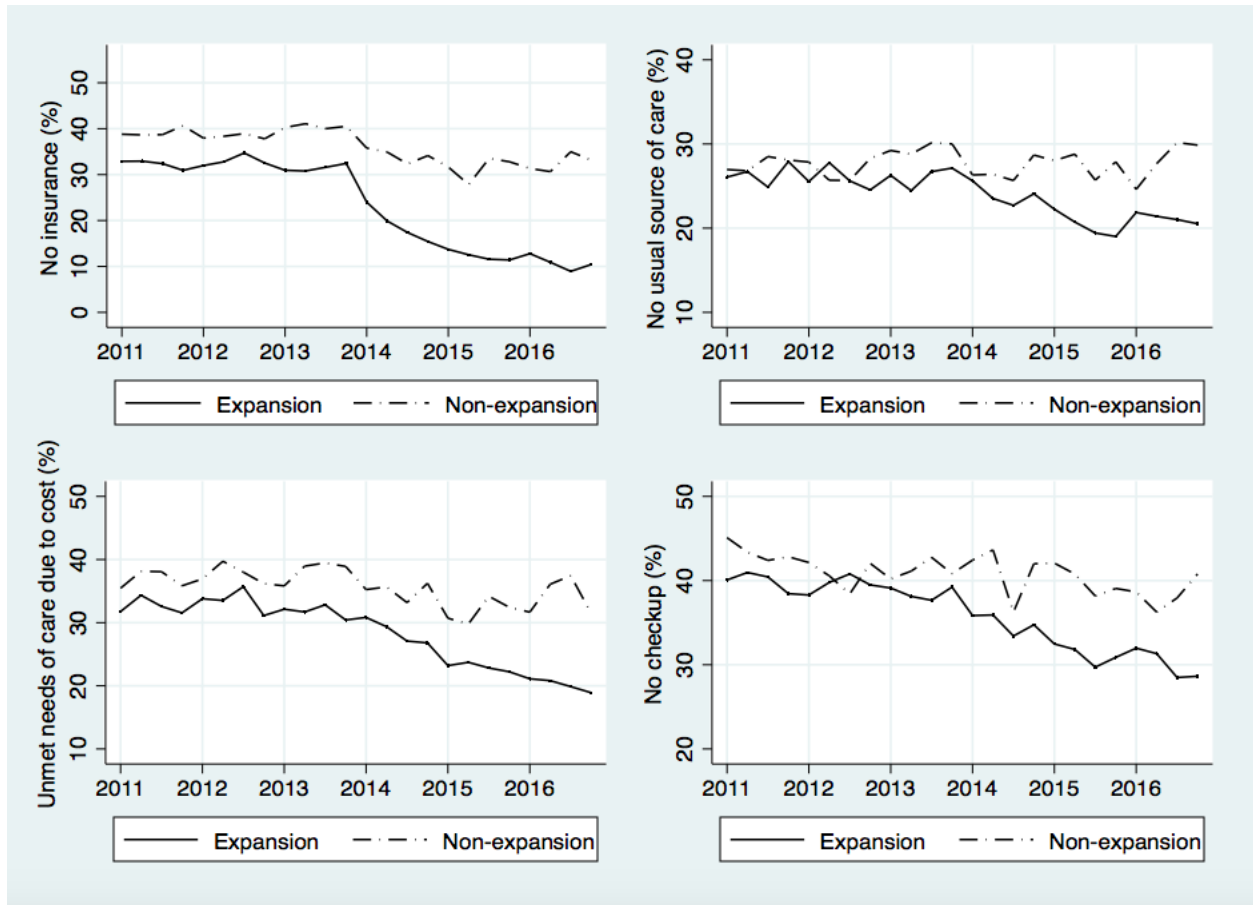

Note. Figures show the quarterly trends of the unadjusted rates of the access outcomes (Uninsured, No usual source of care, Unmet care needs due to cost, and No annual check-up) for childless Whites aged 19 to 64 with income below 100 % of the FPL.

## 4.2. Unadjusted Rates of Health Outcomes

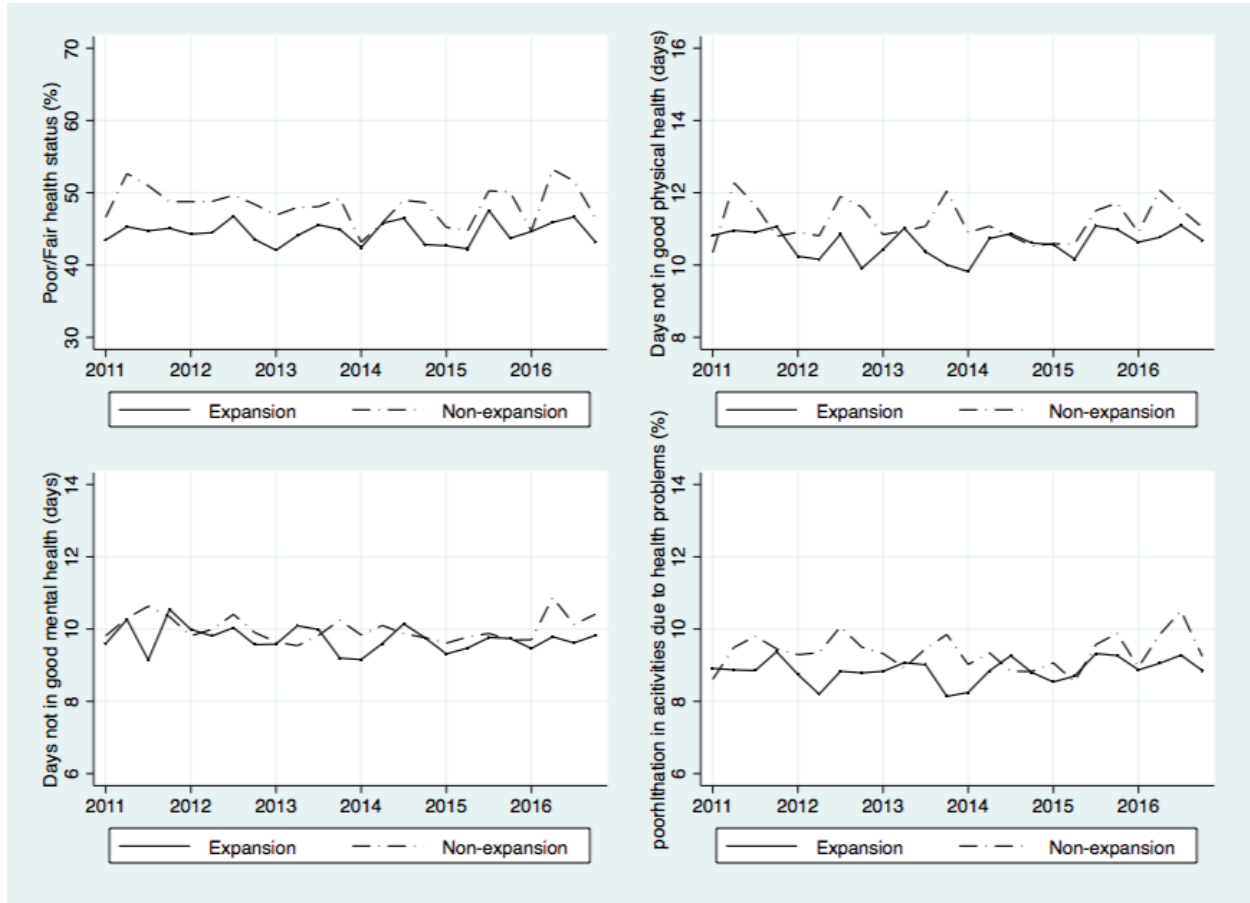

Note. Figures show the quarterly trends of the unadjusted rates of the health outcomes (Fair or poor health status, Poor physical health days, Poor mental health days, and Days with health-related activity limitation) for childless Whites aged 19 to 64 with income below 100 % of the FPL.

Figure A5. Trends in Outcomes for Poor Childless Adults for Blacks between Expansion and Non-expansion states

### 5.1. Unadjusted Rates of Access Outcomes

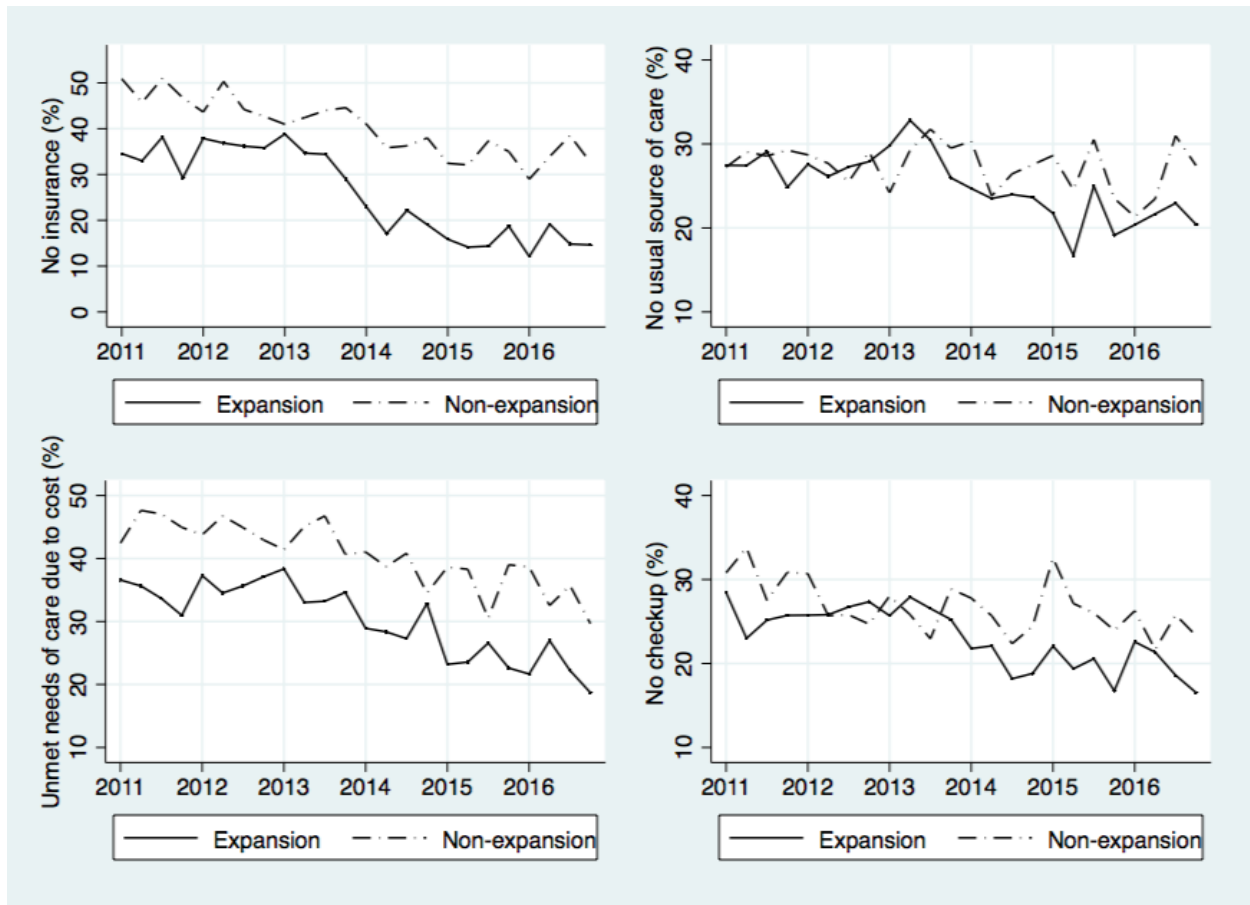

Note. Figures show the quarterly trends of the unadjusted rates of the access outcomes (Uninsured, No usual source of care, Unmet care needs due to cost, and No annual check-up) for childless Blacks aged 19 to 64 with income below 100 % of the FPL.

## 5.2. Unadjusted Rates of Health Outcomes

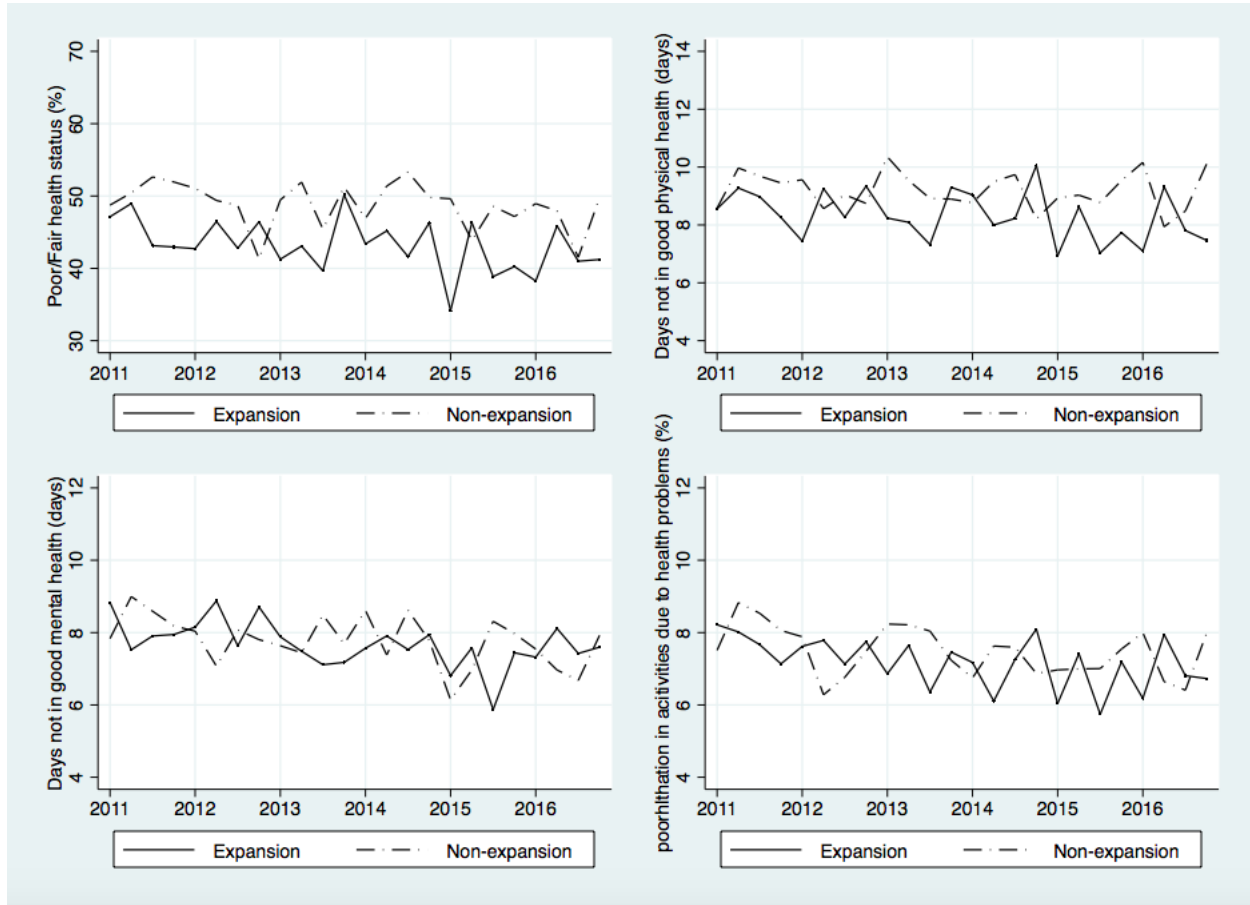

Note. Figures show the quarterly trends of the unadjusted rates of the health outcomes (Fair or poor health status, Poor physical health days, Poor mental health days, and Days with health-related activity limitation) for childless Blacks aged 19 to 64 with income below 100 % of the FPL.

Figure A6. Trends in Outcomes for Poor Childless Adults for Hispanics between Expansion and Non-expansion states

### 6.1. Unadjusted Rates of Access Outcomes

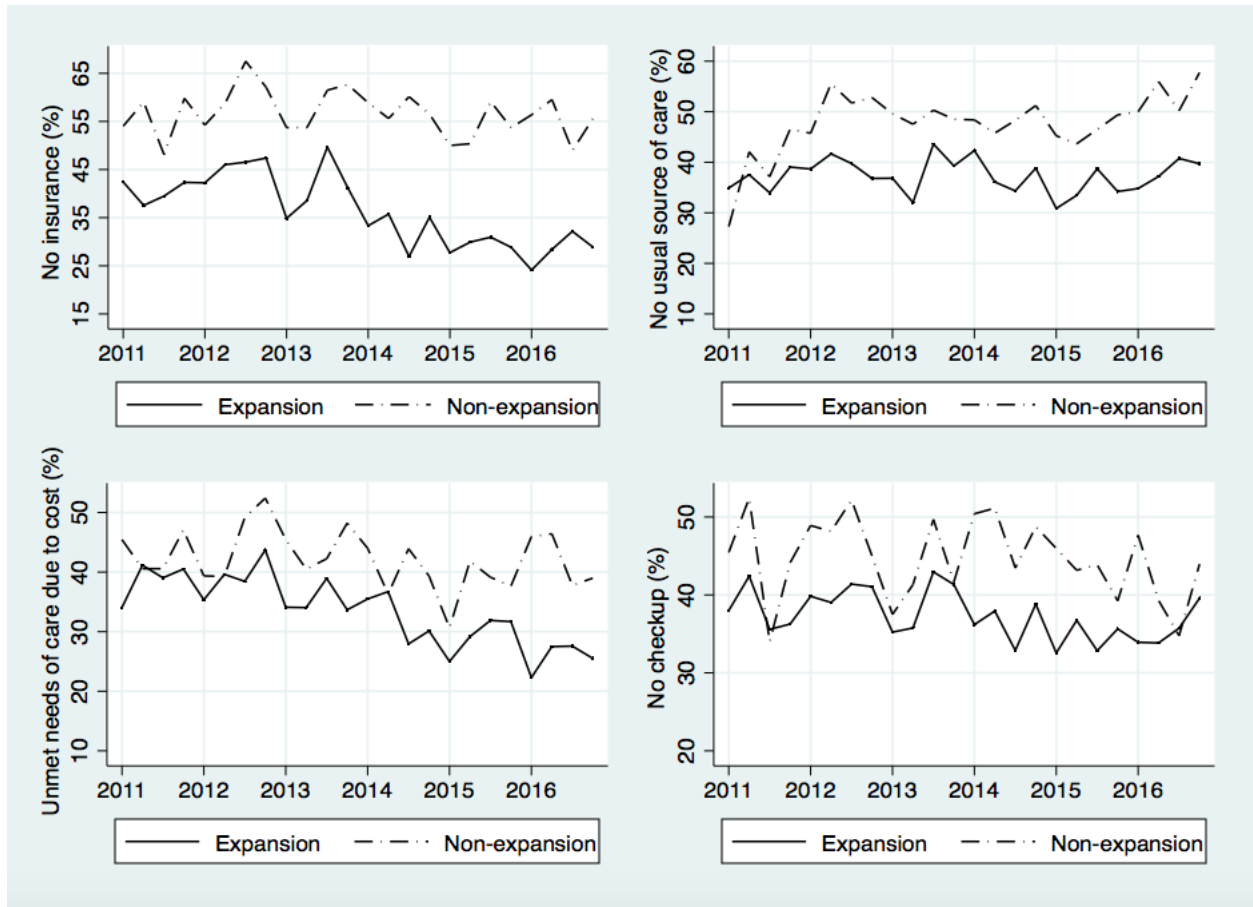

Note. Figures show the quarterly trends of the unadjusted rates of the access outcomes (Uninsured, No usual source of care, Unmet care needs due to cost, and No annual check-up) for childless Hispanics aged 19 to 64 with income below 100 % of the FPL.

## 6.2. Unadjusted Rates of Health Outcomes

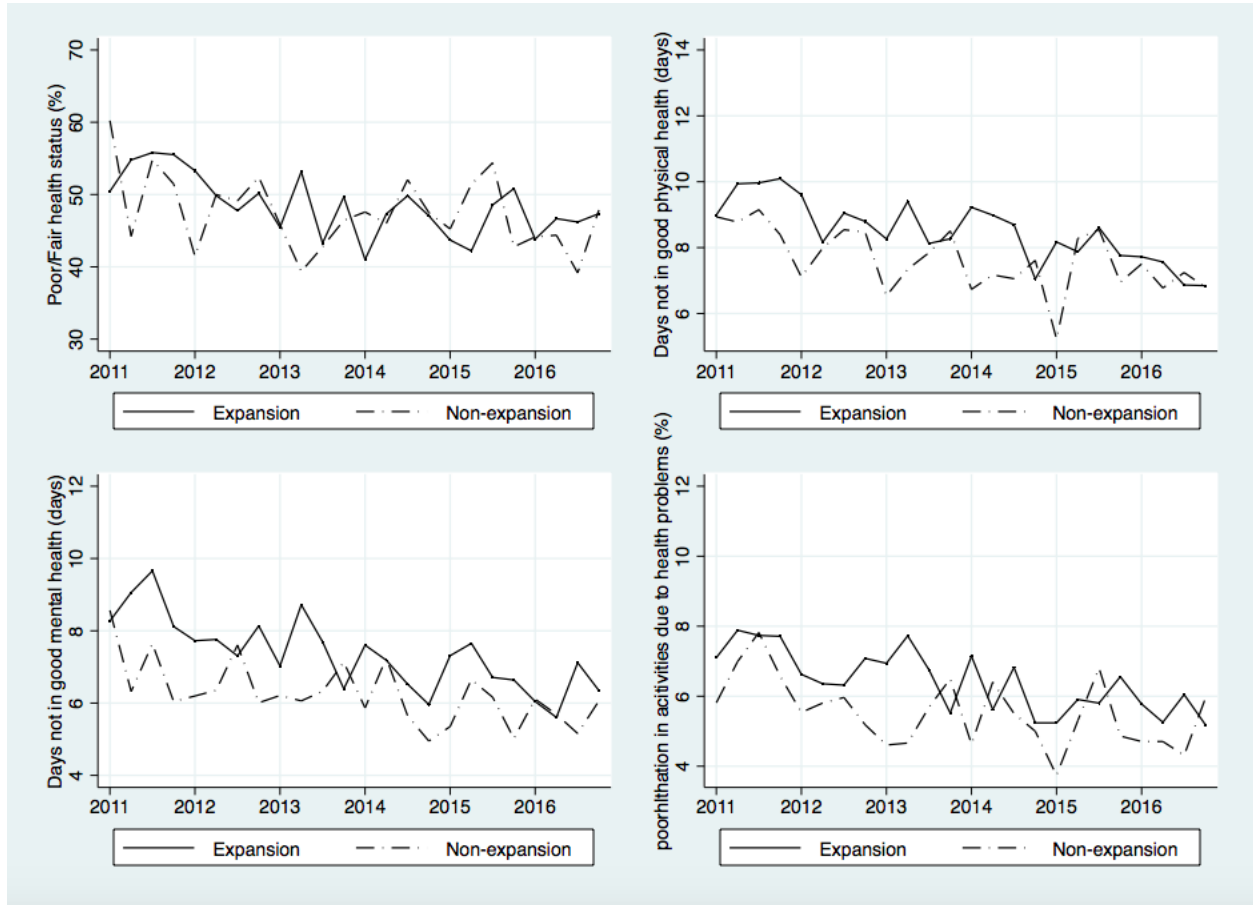

Note. Figures show the quarterly trends of the unadjusted rates of the health outcomes (Fair or poor health status, Poor physical health days, Poor mental health days, and Days with health-related activity limitation) for childless Hispanics aged 19 to 64 with income below 100 % of the FPL.

## Appendix 6. Parallel Trend Assumption Test

$$Y_{ist} = \beta_0 + \beta_1 Treatment*2011 + \beta_2 Treatment*2012 + \beta_3 Treatment*2014 + \beta_4 Treatment*2015 + \beta_5 Treatment*2016 + \lambda_t + \gamma_s + \beta_6 X_{ist} + \beta_7 X_{st} + \varepsilon_{ist} \quad (2)$$

where  $Y_{ist}$  is the outcome for individual  $i$  in state  $s$  with a survey date in year  $t$ . *Treatment* is a dummy variable equal to one for individuals residing in an expansion state, and zero otherwise. *2011, 2012, 2014, 2015, and 2016* are year dummies and *2013* is the omitted reference group year dummy variable.  $\lambda_t$  are quarterly time fixed effects from January 2011 through December 2016, and  $\gamma_s$  are state fixed effects. Unconditional treatment and post-period dummy variables are not specified in the models since their effects are captured by quarter and state fixed effects.  $X_{ist}$  is a vector of demographic, socioeconomic, and health risk factors of individual respondents (e.g., age, gender, education) and  $X_{st}$  is a vector of state time-varying contextual environmental factors that may influence outcomes (e.g., physician supply, unemployment rate).

Table A7. Parallel trends between treatment and control groups during pre-reform period for all poor childless adults

|                                                                    | Uninsured            | No usual<br>Source of<br>care | Unmet care<br>needs due to<br>cost | No annual<br>check-up | Self-<br>reported<br>Fair or poor<br>health<br>status | Poor<br>physical<br>health days | Poor mental<br>health days | Days with<br>health-related<br>activity<br>limitation |
|--------------------------------------------------------------------|----------------------|-------------------------------|------------------------------------|-----------------------|-------------------------------------------------------|---------------------------------|----------------------------|-------------------------------------------------------|
| <b>Yr2011_Treat<br/>ment</b>                                       | 0.020<br>(0.025)     | 0.026<br>(0.022)              | 0.014<br>(0.025)                   | -0.026<br>(0.023)     | -0.001<br>(0.016)                                     | 0.176<br>(0.363)                | 0.408<br>(0.539)           | -0.072<br>(0.415)                                     |
| <b>Yr2012_Treat<br/>ment</b>                                       | 0.034<br>(0.023)     | 0.008<br>(0.015)              | 0.009<br>(0.018)                   | -0.038**<br>(0.019)   | -0.021<br>(0.013)                                     | -0.027<br>(0.362)               | -0.207<br>(0.382)          | -0.622<br>(0.457)                                     |
| <b>Yr2014_Treat<br/>ment</b>                                       | -0.058*<br>(0.030)   | -0.001<br>(0.020)             | -0.031<br>(0.021)                  | -0.055***<br>(0.016)  | -0.030*<br>(0.017)                                    | -0.116<br>(0.420)               | -0.756*<br>(0.388)         | -0.799*<br>(0.408)                                    |
| <b>Yr2015_Treat<br/>ment</b>                                       | -0.072**<br>(0.028)  | -0.025<br>(0.019)             | -0.020<br>(0.021)                  | -0.056***<br>(0.021)  | -0.040**<br>(0.018)                                   | -0.125<br>(0.456)               | -0.639<br>(0.432)          | -0.533<br>(0.435)                                     |
| <b>Yr2016_Treat<br/>ment</b>                                       | -0.092***<br>(0.027) | -0.017<br>(0.020)             | -0.045<br>(0.030)                  | -0.044<br>(0.028)     | -0.003<br>(0.014)                                     | -0.573<br>(0.481)               | -0.222<br>(0.528)          | -0.698<br>(0.506)                                     |
| <b>F-Statistic for<br/>(Yr2011_Treat<br/>=Yr2012_Treat<br/>=0)</b> | 1.09<br>(0.34)       | 0.68<br>(0.51)                | 0.19<br>(0.83)                     | 2.04<br>(0.14)        | 2.09<br>(0.13)                                        | 0.21<br>(0.81)                  | 1.07<br>(0.35)             | 1.86<br>(0.17)                                        |

Notes. Panel 1 to 5 displays marginal effects and standard errors are in parentheses. All regressions control for age, gender, race, education, marital status, employment status, chronic diseases status, tobacco use, state-fixed effects, and quarter/year-fixed effects. We also control for state-year variables including the number of hospital beds and physicians per 1,000 population, unemployment rate, per capita income, racial/ethnic composition, and Senate voting records.

\*\*\*p<0.01; \*\*p<0.05; \*p<0.1. F-statistic displays in panel 6 and p-values are in parentheses.

Table A8. Parallel trends between treatment and control groups during pre-reform period for poor childless adults for Whites

|                                                                    | Uninsured            | No usual<br>Source of<br>care | Unmet care<br>needs due to<br>cost | No annual<br>check-up | Self-<br>reported<br>Fair or poor<br>health<br>status | Poor<br>physical<br>health days | Poor mental<br>health days | Days with<br>health-related<br>activity<br>limitation |
|--------------------------------------------------------------------|----------------------|-------------------------------|------------------------------------|-----------------------|-------------------------------------------------------|---------------------------------|----------------------------|-------------------------------------------------------|
| <b>Yr2011_Treatm<br/>ent</b>                                       | -0.001<br>(0.029)    | 0.034<br>(0.031)              | -0.011<br>(0.029)                  | -0.011<br>(0.027)     | -0.019<br>(0.016)                                     | 0.298<br>(0.700)                | 0.592<br>(0.555)           | 0.548<br>(0.528)                                      |
| <b>Yr2012_Treatm<br/>ent</b>                                       | 0.044**<br>(0.017)   | 0.017<br>(0.023)              | 0.012<br>(0.020)                   | -0.008<br>(0.027)     | -0.008<br>(0.019)                                     | 0.191<br>(0.527)                | -0.134<br>(0.560)          | -0.339<br>(0.558)                                     |
| <b>Yr2014_Treatm<br/>ent</b>                                       | -0.055<br>(0.034)    | 0.004<br>(0.023)              | -0.019<br>(0.023)                  | -0.042<br>(0.027)     | -0.012<br>(0.020)                                     | 0.028<br>(0.583)                | -0.383<br>(0.559)          | -0.283<br>(0.513)                                     |
| <b>Yr2015_Treatm<br/>ent</b>                                       | -0.093***<br>(0.033) | -0.035<br>(0.023)             | -0.061**<br>(0.027)                | -0.065**<br>(0.032)   | -0.043*<br>(0.022)                                    | -0.484<br>(0.599)               | -0.666<br>(0.535)          | -0.487<br>(0.425)                                     |
| <b>Yr2016_Treatm<br/>ent</b>                                       | -0.117***<br>(0.024) | -0.022<br>(0.022)             | -0.070***<br>(0.022)               | -0.053<br>(0.033)     | -0.006<br>(0.021)                                     | -0.559<br>(0.555)               | 0.136<br>(0.782)           | 0.076<br>(0.577)                                      |
| <b>F-Statistic for<br/>(Yr2011_Treat<br/>=Yr2012_Treat<br/>=0)</b> | 4.08<br>(0.02)       | 0.67<br>(0.51)                | 0.28<br>(0.76)                     | 0.09<br>(0.92)        | 0.65<br>(0.53)                                        | 0.09<br>(0.91)                  | 1.52<br>(0.23)             | 1.89<br>(0.16)                                        |

Note. Panel 1 to 5 displays marginal effects and standard errors are in parentheses. All regressions control for age, gender, education, marital status, employment status, chronic diseases status, tobacco use, state-fixed effects, and quarter/year-fixed effects. We also control for state-year variables including the number of hospital beds and physicians per 1,000 population, unemployment rate, per capita income, racial/ethnic composition, and Senate voting records. \*\*\*p<0.01; \*\*p<0.05; \*p<0.1. F-statistic displays in panel 6 and p-values are in parentheses.

Table A9. Parallel trends between treatment and control groups during pre-reform period for poor childless adults for Blacks

|                                                                | Uninsured            | No usual<br>Source of<br>care | Unmet care<br>needs due to<br>cost | No annual<br>check-up | Self-<br>reported<br>Fair or<br>poor health<br>status | Poor<br>physical<br>health days | Poor mental<br>health days | Days with<br>health-related<br>activity<br>limitation |
|----------------------------------------------------------------|----------------------|-------------------------------|------------------------------------|-----------------------|-------------------------------------------------------|---------------------------------|----------------------------|-------------------------------------------------------|
| <b>Yr2011_Treat<br/>ment</b>                                   | -0.049<br>(0.045)    | -0.017<br>(0.041)             | 0.015<br>(0.043)                   | -0.124**<br>(0.052)   | 0.018<br>(0.055)                                      | 0.755<br>(0.956)                | 0.721<br>(1.122)           | -0.428<br>(0.793)                                     |
| <b>Yr2012_Treat<br/>ment</b>                                   | 0.004<br>(0.040)     | 0.009<br>(0.046)              | 0.032<br>(0.055)                   | -0.066<br>(0.041)     | 0.028<br>(0.038)                                      | 0.076<br>(0.804)                | 0.809<br>(1.434)           | 0.362<br>(1.221)                                      |
| <b>Yr2014_Treat<br/>ment</b>                                   | -0.142**<br>(0.065)  | -0.010<br>(0.038)             | -0.059<br>(0.052)                  | -0.082**<br>(0.034)   | -0.027<br>(0.057)                                     | -0.798<br>(1.075)               | -1.016<br>(0.895)          | -0.687<br>(0.886)                                     |
| <b>Yr2015_Treat<br/>ment</b>                                   | -0.140**<br>(0.057)  | -0.018<br>(0.028)             | -0.040<br>(0.039)                  | -0.094*<br>(0.047)    | -0.036<br>(0.058)                                     | -0.546<br>(1.071)               | -1.278<br>(0.788)          | -1.407*<br>(0.767)                                    |
| <b>Yr2016_Treat<br/>ment</b>                                   | -0.147***<br>(0.042) | 0.014<br>(0.044)              | -0.084<br>(0.056)                  | -0.096**<br>(0.046)   | 0.012<br>(0.044)                                      | -1.072<br>(1.172)               | -0.287<br>(0.910)          | -1.269<br>(1.070)                                     |
| <b>F-Statistic<br/>(Yr2011_Treat<br/>=Yr2012_Treat<br/>=0)</b> | 1.7<br>(0.19)        | 0.18<br>(0.84)                | 0.18<br>(0.84)                     | 3.36<br>(0.04)        | 0.29<br>(0.75)                                        | 0.36<br>(0.7)                   | 0.24<br>(0.79)             | 0.34<br>(0.71)                                        |

Note. Panel 1 to 5 displays marginal effects and standard errors are in parentheses. All regressions control for age, gender, education, marital status, employment status, chronic diseases status, tobacco use, state-fixed effects, and quarter/year-fixed effects. We also control for state-year variables including the number of hospital beds and physicians per 1,000 population, unemployment rate, per capita income, racial/ethnic composition, and Senate voting records. \*\*\*p<0.01; \*\*p<0.05; \*p<0.1. F-statistic displays in panel 6 and p-values are in parentheses.

Table A10. Parallel trends between treatment and control groups during pre-reform period for poor childless adults for Hispanics

|                                                                    | Uninsured          | No usual<br>Source of<br>care | Unmet care<br>needs due to<br>cost | No annual<br>check-up | Self-<br>reported<br>Fair or poor<br>health<br>status | Poor<br>physical<br>health days | Poor mental<br>health days | Days with<br>health-related<br>activity<br>limitation |
|--------------------------------------------------------------------|--------------------|-------------------------------|------------------------------------|-----------------------|-------------------------------------------------------|---------------------------------|----------------------------|-------------------------------------------------------|
| <b>Yr2011_Treatm<br/>ent</b>                                       | 0.121**<br>(0.047) | 0.010<br>(0.050)              | 0.138**<br>(0.052)                 | 0.025<br>(0.038)      | 0.049<br>(0.041)                                      | -0.420<br>(0.562)               | 1.590<br>(1.003)           | -0.554<br>(0.436)                                     |
| <b>Yr2012_Treatm<br/>ent</b>                                       | 0.076<br>(0.053)   | -0.082*<br>(0.041)            | 0.096***<br>(0.034)                | -0.065<br>(0.042)     | -0.065**<br>(0.029)                                   | -1.288*<br>(0.650)              | 0.215<br>(1.419)           | -2.136**<br>(0.826)                                   |
| <b>Yr2014_Treatm<br/>ent</b>                                       | -0.016<br>(0.048)  | -0.034<br>(0.039)             | 0.032<br>(0.033)                   | -0.067<br>(0.045)     | -0.072**<br>(0.030)                                   | -0.748<br>(0.818)               | 0.051<br>(0.624)           | -2.147**<br>(0.952)                                   |
| <b>Yr2015_Treatm<br/>ent</b>                                       | 0.001<br>(0.075)   | -0.042<br>(0.056)             | 0.099**<br>(0.048)                 | -0.061<br>(0.084)     | -0.066<br>(0.049)                                     | -0.646<br>(0.925)               | 0.104<br>(0.931)           | -1.222<br>(1.249)                                     |
| <b>Yr2016_Treatm<br/>ent</b>                                       | -0.005<br>(0.046)  | -0.062<br>(0.055)             | 0.021<br>(0.060)                   | -0.009<br>(0.062)     | -0.030<br>(0.048)                                     | -1.949<br>(1.301)               | -0.201<br>(0.828)          | -2.534*<br>(1.388)                                    |
| <b>F-Statistic for<br/>(Yr2011_Treat<br/>=Yr2012_Treat<br/>=0)</b> | 3.3<br>(0.04)      | 3.15<br>(0.05)                | 5.83<br>(0.01)                     | 3.24<br>(0.05)        | 4.96<br>(0.01)                                        | 2.14<br>(0.13)                  | 1.57<br>(0.22)             | 3.51<br>(0.04)                                        |

Note. Panel 1 to 5 displays marginal effects and standard errors are in parentheses. All regressions control for age, gender, education, marital status, employment status, chronic diseases status, tobacco use, state-fixed effects, and quarter/year-fixed effects. We also control for state-year variables including the number of hospital beds and physicians per 1,000 population, unemployment rate, per capita income, racial/ethnic composition, and Senate voting records. \*\*\*p<0.01; \*\*p<0.05; \*p<0.1. F-statistic displays in panel 6 and p-values are in parentheses.

## Appendix 7. Robustness Check

We estimate four robustness checks of the empirical results, reported in Tables A11 through A17 in Appendix 7. First, we tested their robustness to changes in the specification individual and state-level control variables for all nonelderly childless adults and for each racial/ethnic subgroup (Table A11-A14). Selected individual and state-level covariates were specified in our fully-specified model to control for potential correlation between unobserved variables and the treatment of Medicaid expansion. We compared the results of models that include: (1) the full sets of individual and state time-varying controls, (2) only individual-level controls, (3) individual controls plus state unemployment rates, and (4) the full sets of individual and state time-varying controls except physician/1000 population. We also estimated models that include the full sets of individual and exclude other state time-varying control and found the results were robust with the exclusion of each time-varying control. The additional results are available on request.

In the second set of sensitivity analyses, we examined whether our fully-specified DD model results were robust with respect to the exclusion of certain states which expanded Medicaid before January 2014 and after Jan 2016 from the estimation sample (Table A15). Tables A2 and A3 in Appendix 1 show which states expanded their Medicaid programs with more limited coverage under Section 1115 waivers prior to January 2014. In their study of the ACA Medicaid expansion on nonelderly childless adults Dworsky and Eibner (2016) excluded 13 states which extended eligibility any Medicaid coverage to some childless adults prior to 2014. We assigned these states into early full expansion states (DE, DC, MA, NY, VT) partial expansion states (CA, CT, HI, MN) and limited expansion states (CO, IA, NJ, WA) depending upon the income limits that were set for Medicaid eligibility and limitations on Medicaid

coverage (Table A1, Appendix 1). Our fully-specified DD model was re-estimated several times, each time excluding states one of these subgroups, and then again with all 13 states excluded. We also tested the sensitivity of our results to use of the expansion state assignments employed by Simon et al (2016) by re-assigning Wisconsin to be an expansion state. Lastly, we excluded two late expanders, Montana (Jan. 2016) and Louisiana (July. 2016) from the estimation sample and re-estimated fully-specified DD model.

In the third set of sensitivity analyses, we examined the effects of ACA Medicaid expansion under different definitions for low income: 1) income below 100% of the FPL (baseline); and 2) income below 138 % of the FPL. As noted earlier we restricted our estimation sample to childless adults with incomes below 100 % of the FPL because individuals with income between 100 to 138 % of the FPL are eligible for subsidies for the purchase of health insurance in the ACA marketplace in non-expansion states. If these subsidies induced childless adults in this income subgroup in non-expansion states to purchase insurance in the Marketplace after January 2014, then smaller ACA Medicaid expansion impacts are expected for this income subgroup. Table A16 in Appendix 7 contains estimates of Medicaid expansion impacts on outcomes for nonelderly childless adults in the two income subgroups defined above.

In our fourth set of sensitivity analyses, we compared the estimation results from stratified DD and DDD models (Table A17). The DDD model specification is shown in equation (3).

$$\begin{aligned}
Y_{ist} = & \beta_0 + \beta_1 \text{Expansion}_{st} * \text{Hispanics} + \beta_2 \text{Expansion}_{st} * \text{Black} + \beta_3 \text{Expansion}_{st} * \text{Other} \\
& + \beta_4 \text{Expansion}_{st} + \beta_5 \text{Hispanics} + \beta_6 \text{Black} + \beta_7 \text{Other} \\
& + \beta_8 \lambda_t * \text{Hispanics} + \beta_9 \lambda_t * \text{Black} + \beta_{10} \lambda_t * \text{Other} \\
& + \lambda_t + \gamma_s + \beta_{11} X_{ist} + \beta_{12} X_{st} + \varepsilon_{ist}
\end{aligned} \tag{3}$$

The key difference between the DDD model and the more general stratified DD models is that the DDD coefficients for all control variables are constrained to be invariant across all race/ethnic groups. As shown in Table A17, these two models showed differences in statistical significance and sign in Hispanic-White disparities in health outcomes. In the stratified DD model, there was a modest empirical evidence that Hispanic-White disparity in fair or poor health status decreased, while the DDD model found increases in the Hispanic-White disparities in fair or poor health status, poor physical and mental health days, and days with health-related activity limitation.

Table A11. Effects of ACA Medicaid expansion on outcomes for all poor childless adults by covariate specification

|                                                                  | Uninsured            | No usual<br>Source of care | Unmet care<br>needs due<br>to cost | No annual<br>check-up | Self-<br>reported<br>Fair or poor<br>health status | Poor<br>physical<br>health days | Poor<br>mental<br>health days | Days with<br>health-<br>related<br>activity<br>limitation |
|------------------------------------------------------------------|----------------------|----------------------------|------------------------------------|-----------------------|----------------------------------------------------|---------------------------------|-------------------------------|-----------------------------------------------------------|
| <b>Full set of state time-<br/>varying covariates</b>            | -0.093***<br>(0.018) | -0.034***<br>(0.012)       | -0.038***<br>(0.013)               | -0.034**<br>(0.014)   | -0.025***<br>(0.009)                               | -0.442<br>(0.321)               | -0.779***<br>(0.244)          | -0.647**<br>(0.251)                                       |
| <b>Only individual<br/>controls</b>                              | -0.093***<br>(0.020) | -0.040***<br>(0.013)       | -0.039***<br>(0.011)               | -0.038**<br>(0.015)   | -0.028***<br>(0.008)                               | -0.594***<br>(0.217)            | -0.828***<br>(0.234)          | -0.820***<br>(0.229)                                      |
| <b>Individual controls &amp;<br/>State unemployment<br/>rate</b> | -0.087***<br>(0.020) | -0.037***<br>(0.013)       | -0.036***<br>(0.011)               | -0.033**<br>(0.015)   | -0.027***<br>(0.008)                               | -0.537**<br>(0.231)             | -0.759***<br>(0.215)          | -0.837***<br>(0.236)                                      |
| <b>Full set of controls &amp;<br/>No physician/1000</b>          | -0.098***<br>(0.017) | -0.034***<br>(0.012)       | -0.038***<br>(0.012)               | -0.035**<br>(0.014)   | -0.024***<br>(0.009)                               | -0.443<br>(0.322)               | -0.755***<br>(0.220)          | -0.647**<br>(0.242)                                       |
| <b>Pre-treatment Mean<br/>in Expansion States</b>                | 0.385<br>(0.487)     | 0.381<br>(0.486)           | 0.35<br>(0.477)                    | 0.428<br>(0.495)      | 0.385<br>(0.487)                                   | 8.035<br>(11.15)                | 8.265<br>(11.004)             | 6.802<br>(10.57)                                          |
| <b>Sample size</b>                                               | 86,808               | 86,865                     | 86,918                             | 85,769                | 86,821                                             | 84,727                          | 84,974                        | 85,314                                                    |

Notes. Panel 1 to 4 displays marginal effects and standard errors are in parentheses. Panel 1 shows the baseline model controlling for age, gender, race, education, marital status, employment status, chronic diseases status, tobacco use, state-fixed effects, and quarter/year-fixed effects, as well as controlling for state-year variables including the number of hospital beds and physicians per 1,000 population, unemployment rate, per capita income, racial/ethnic composition, and Senate voting records. Panel 2 shows estimates without controlling for any state-year covariates. Panel 3 shows estimates without controlling for state-year covariates except unemployment rate. Panel 4 shows estimates controlling for the full set of individual and state time-varying controls except the number of physician/1000 population. Pre-treatment means are the weighted means of outcomes before ACA Medicaid expansion was implemented in expansion states and standard deviations are in parentheses. \*\*\*p<0.01; \*\*p<0.05; \*p<0.1.

Table A12. Effects of ACA Medicaid expansion on outcomes for poor White childless adults by covariate specification

|                                                                  | Uninsured            | No usual<br>Source of care | Unmet care<br>needs due<br>to cost | No annual<br>check-up | Self-<br>reported<br>Fair or poor<br>health status | Poor<br>physical<br>health days | Poor<br>mental<br>health days | Days with<br>health-<br>related<br>activity<br>limitation |
|------------------------------------------------------------------|----------------------|----------------------------|------------------------------------|-----------------------|----------------------------------------------------|---------------------------------|-------------------------------|-----------------------------------------------------------|
| <b>Full set of state time-<br/>varying covariates</b>            | -0.108***<br>(0.021) | -0.044***<br>(0.012)       | -0.048***<br>(0.013)               | -0.052***<br>(0.019)  | -0.018**<br>(0.009)                                | -0.649**<br>(0.325)             | -0.627**<br>(0.285)           | -0.533*<br>(0.291)                                        |
| <b>Only individual<br/>controls</b>                              | -0.110***<br>(0.018) | -0.036**<br>(0.015)        | -0.048***<br>(0.012)               | -0.048***<br>(0.017)  | -0.024**<br>(0.012)                                | -0.720***<br>(0.278)            | -0.671**<br>(0.300)           | -0.699**<br>(0.292)                                       |
| <b>Individual controls &amp;<br/>State unemployment<br/>rate</b> | -0.104***<br>(0.018) | -0.031**<br>(0.014)        | -0.046***<br>(0.011)               | -0.045***<br>(0.017)  | -0.025**<br>(0.013)                                | -0.764***<br>(0.278)            | -0.641**<br>(0.305)           | -0.725**<br>(0.298)                                       |
| <b>Full set of controls &amp;<br/>No physician/1000</b>          | -0.113***<br>(0.021) | -0.043***<br>(0.013)       | -0.049***<br>(0.013)               | -0.055***<br>(0.019)  | -0.020**<br>(0.009)                                | -0.654**<br>(0.316)             | -0.586**<br>(0.268)           | -0.521*<br>(0.278)                                        |
| <b>Pre-treatment Mean<br/>in Expansion States</b>                | 0.349<br>(0.529)     | 0.327<br>(0.52)            | 0.346<br>(0.527)                   | 0.446<br>(0.551)      | 0.376<br>(0.537)                                   | 8.893<br>(12.899)               | 9.285<br>(12.637)             | 7.487<br>(12.224)                                         |
| <b>Sample size</b>                                               | 53,490               | 53,549                     | 53,585                             | 52,762                | 53,529                                             | 52,304                          | 52,406                        | 52,588                                                    |

Notes. Panel 1 to 4 displays marginal effects and standard errors are in parentheses. Panel 1 shows baseline model controlling for age, gender, education, marital status, employment status, chronic diseases status, tobacco use, state-fixed effects, and quarter/year-fixed effects, as well as controlling for state-year variables including the number of hospital beds and physicians per 1,000 population, unemployment rate, per capita income, racial/ethnic composition, and Senate voting records. Panel 2 shows estimates without controlling for any state-year covariates. Panel 3 shows estimates without controlling for state-year covariates except unemployment rate. Panel 4 shows estimates controlling for the full set of individual and state time-varying controls except the number of physician/1000 population. Pre-treatment means are the weighted means of outcomes before ACA Medicaid expansion was implemented in expansion states and standard deviations are in parentheses. \*\*\*p<0.01; \*\*p<0.05; \*p<0.1.

Table A13. Effects of ACA Medicaid expansion on outcomes for poor Black childless adults by covariate specification

|                                                                  | Uninsured            | No usual<br>Source of care | Unmet care<br>needs due<br>to cost | No annual<br>check-up | Self-<br>reported<br>Fair or poor<br>health status | Poor<br>physical<br>health days | Poor<br>mental<br>health days | Days with<br>health-<br>related<br>activity<br>limitation |
|------------------------------------------------------------------|----------------------|----------------------------|------------------------------------|-----------------------|----------------------------------------------------|---------------------------------|-------------------------------|-----------------------------------------------------------|
| <b>Full set of state time-<br/>varying covariates</b>            | -0.137***<br>(0.037) | -0.018<br>(0.018)          | -0.065**<br>(0.030)                | -0.032<br>(0.038)     | -0.038<br>(0.038)                                  | -0.850<br>(0.664)               | -1.450**<br>(0.568)           | -1.036**<br>(0.495)                                       |
| <b>Only individual<br/>controls</b>                              | -0.116***<br>(0.042) | -0.037*<br>(0.022)         | -0.055**<br>(0.023)                | -0.049*<br>(0.030)    | -0.046*<br>(0.024)                                 | -0.918<br>(0.564)               | -0.795<br>(0.627)             | -1.599***<br>(0.461)                                      |
| <b>Individual controls &amp;<br/>State unemployment<br/>rate</b> | -0.108***<br>(0.041) | -0.039*<br>(0.023)         | -0.050**<br>(0.023)                | -0.038<br>(0.031)     | -0.043*<br>(0.023)                                 | -0.761<br>(0.489)               | -0.759<br>(0.593)             | -1.599***<br>(0.449)                                      |
| <b>Full set of controls &amp;<br/>No physician/1000</b>          | -0.141***<br>(0.036) | -0.011<br>(0.019)          | -0.059**<br>(0.029)                | -0.026<br>(0.037)     | -0.038<br>(0.038)                                  | -0.946<br>(0.637)               | -1.313**<br>(0.583)           | -1.139**<br>(0.480)                                       |
| <b>Pre-treatment Mean<br/>in Expansion States</b>                | 0.378<br>(0.433)     | 0.371<br>(0.431)           | 0.368<br>(0.43)                    | 0.331<br>(0.421)      | 0.384<br>(0.434)                                   | 7.366<br>(9.434)                | 7.429<br>(9.511)              | 6.964<br>(9.451)                                          |
| <b>Sample size</b>                                               | 13,820               | 13,823                     | 13,812                             | 13,713                | 13,791                                             | 13,427                          | 13,495                        | 13,578                                                    |

Notes. Panel 1 to 4 displays marginal effects and standard errors are in parentheses. Panel 1 shows baseline model controlling for age, gender, education, marital status, employment status, chronic diseases status, tobacco use, state-fixed effects, and quarter/year-fixed effects, as well as controlling for state-year variables including the number of hospital beds and physicians per 1,000 population, unemployment rate, per capita income, racial/ethnic composition, and Senate voting records. Panel 2 shows estimates without controlling for any state-year covariates. Panel 3 shows estimates without controlling for state-year covariates except unemployment rate. Panel 4 shows estimates controlling for the full set of individual and state time-varying controls except the number of physician/1000 population. Pre-treatment means are the weighted means of outcomes before ACA Medicaid expansion was implemented in the expansion states and standard deviations are in parentheses. \*\*\*p<0.01; \*\*p<0.05; \*p<0.1.

Table A14. Effects of ACA Medicaid expansion on outcomes for poor Hispanic childless adults by covariate specification

|                                                                  | Uninsured           | No usual<br>Source of care | Unmet care<br>needs due<br>to cost | No annual<br>check-up | Self-<br>reported<br>Fair or poor<br>health status | Poor<br>physical<br>health days | Poor<br>mental<br>health days | Days with<br>health-<br>related<br>activity<br>limitation |
|------------------------------------------------------------------|---------------------|----------------------------|------------------------------------|-----------------------|----------------------------------------------------|---------------------------------|-------------------------------|-----------------------------------------------------------|
| <b>Full set of state time-<br/>varying covariates</b>            | -0.072**<br>(0.030) | -0.026<br>(0.025)          | -0.028<br>(0.026)                  | -0.045<br>(0.033)     | -0.062**<br>(0.026)                                | -0.207<br>(0.709)               | -0.614<br>(0.868)             | -1.071<br>(0.832)                                         |
| <b>Only individual<br/>controls</b>                              | -0.082**<br>(0.039) | -0.060***<br>(0.021)       | -0.023<br>(0.035)                  | -0.037<br>(0.026)     | -0.037<br>(0.023)                                  | -0.467<br>(0.456)               | -0.902**<br>(0.418)           | -0.618<br>(0.542)                                         |
| <b>Individual controls &amp;<br/>State unemployment<br/>rate</b> | -0.082**<br>(0.040) | -0.062***<br>(0.022)       | -0.023<br>(0.034)                  | -0.053**<br>(0.022)   | -0.032<br>(0.028)                                  | -0.202<br>(0.581)               | -0.691<br>(0.578)             | -0.699<br>(0.604)                                         |
| <b>Full set of controls &amp;<br/>No physician/1000</b>          | -0.075**<br>(0.031) | -0.034<br>(0.024)          | -0.034<br>(0.022)                  | -0.043<br>(0.036)     | -0.053**<br>(0.025)                                | -0.131<br>(0.729)               | -0.928<br>(0.948)             | -0.994<br>(0.858)                                         |
| <b>Pre-treatment Mean<br/>in Expansion States</b>                | 0.495<br>(0.381)    | 0.497<br>(0.381)           | 0.365<br>(0.367)                   | 0.462<br>(0.379)      | 0.456<br>(0.379)                                   | 7.526<br>(8.156)                | 6.97<br>(7.814)               | 5.686<br>(7.398)                                          |
| <b>Sample size</b>                                               | 10,220              | 10,214                     | 10,221                             | 10,118                | 10,196                                             | 9,908                           | 9,975                         | 9,999                                                     |

Notes. Panel 1 to 4 displays marginal effects and standard errors are in parentheses. Panel 1 shows baseline model controlling for age, gender, education, marital status, employment status, chronic diseases status, tobacco use, state-fixed effects, and quarter/year-fixed effects, as well as controlling for state-year variables including the number of hospital beds and physicians per 1,000 population, unemployment rate, per capita income, racial/ethnic composition, and Senate voting records. Panel 2 shows estimates without controlling for any state-year covariates. Panel 3 shows estimates without controlling for state-year covariates except unemployment rate. Panel 4 shows estimates controlling for the full set of individual and state time-varying controls except the number of physician/1000 population. Pre-treatment means are the weighted means of outcomes before ACA Medicaid expansion was implemented in expansion states and standard deviations are in parentheses. \*\*\*p<0.01; \*\*p<0.05; \*p<0.1.

Table A15. Effects of the ACA Medicaid expansion on outcomes for poor childless adults by excluding states with prior-expansion or late expanders

|                                                   | Uninsured            | No usual<br>Source of care | Unmet care<br>needs due<br>to cost | No annual<br>check-up | Self-<br>reported<br>Fair or poor<br>health status | Poor<br>physical<br>health days | Poor<br>mental<br>health days | Days with<br>health-<br>related<br>activity<br>limitation |
|---------------------------------------------------|----------------------|----------------------------|------------------------------------|-----------------------|----------------------------------------------------|---------------------------------|-------------------------------|-----------------------------------------------------------|
| <b>Baseline<br/>(1)</b>                           | -0.093***<br>(0.018) | -0.034***<br>(0.012)       | -0.038***<br>(0.013)               | -0.034**<br>(0.014)   | -0.025***<br>(0.009)                               | -0.442<br>(0.321)               | -0.779***<br>(0.244)          | -0.647**<br>(0.251)                                       |
| <b>Pre-treatment Mean in<br/>Expansion States</b> | 0.385<br>(0.487)     | 0.381<br>(0.486)           | 0.35<br>(0.477)                    | 0.428<br>(0.495)      | 0.385<br>(0.487)                                   | 8.035<br>(11.15)                | 8.265<br>(11.004)             | 6.802<br>(10.57)                                          |
| <b>Sample size</b>                                | 86,808               | 86,865                     | 86,918                             | 85,769                | 86,821                                             | 84,727                          | 84,974                        | 85,314                                                    |
| <b>No Full expansion<br/>(2)</b>                  | -0.110***<br>(0.018) | -0.040***<br>(0.012)       | -0.046***<br>(0.012)               | -0.044***<br>(0.014)  | -0.025***<br>(0.009)                               | -0.508<br>(0.336)               | -0.928***<br>(0.245)          | -0.689**<br>(0.260)                                       |
| <b>Pre-treatment Mean in<br/>Expansion States</b> | 0.404<br>(0.491)     | 0.395<br>(0.489)           | 0.359<br>(0.48)                    | 0.445<br>(0.497)      | 0.391<br>(0.488)                                   | 8.189<br>(11.258)               | 8.416<br>(11.076)             | 6.935<br>(10.645)                                         |
| <b>Sample size</b>                                | 79,333               | 79,384                     | 79,437                             | 78,346                | 79,362                                             | 77,475                          | 77,699                        | 77,996                                                    |
| <b>No Partial expansion<br/>(3)</b>               | -0.110***<br>(0.019) | -0.034***<br>(0.012)       | -0.039***<br>(0.013)               | -0.037**<br>(0.017)   | -0.025**<br>(0.009)                                | -0.603*<br>(0.353)              | -0.849***<br>(0.241)          | -0.698**<br>(0.270)                                       |
| <b>Pre-treatment Mean in<br/>Expansion States</b> | 0.385<br>(0.487)     | 0.351<br>(0.477)           | 0.361<br>(0.48)                    | 0.411<br>(0.492)      | 0.396<br>(0.489)                                   | 8.514<br>(11.432)               | 8.584<br>(11.257)             | 7.138<br>(10.837)                                         |
| <b>Sample size</b>                                | 77,691               | 77,743                     | 77,780                             | 76,706                | 77,677                                             | 75,697                          | 75,939                        | 76,264                                                    |
| <b>No Full or Partial<br/>expansion<br/>(4)</b>   | -0.134***<br>(0.018) | -0.040***<br>(0.012)       | -0.046***<br>(0.013)               | -0.049***<br>(0.018)  | -0.025**<br>(0.010)                                | -0.742**<br>(0.353)             | -0.986***<br>(0.256)          | -0.777***<br>(0.281)                                      |
| <b>Pre-treatment Mean in<br/>Expansion States</b> | 0.413<br>(0.492)     | 0.365<br>(0.481)           | 0.376<br>(0.485)                   | 0.432<br>(0.495)      | 0.407<br>(0.491)                                   | 8.844<br>(11.632)               | 8.875<br>(11.405)             | 7.407<br>(10.99)                                          |
| <b>Sample size</b>                                | 70,216               | 70,262                     | 70,299                             | 69,283                | 70,218                                             | 68,445                          | 68,664                        | 68,946                                                    |

|                                                   | Uninsured            | No usual<br>Source of care | Unmet care<br>needs due<br>to cost | No annual<br>check-up | Self-<br>reported<br>Fair or poor<br>health status | Poor<br>physical<br>health days | Poor<br>mental<br>health days | Days with<br>health-<br>related<br>activity<br>limitation |
|---------------------------------------------------|----------------------|----------------------------|------------------------------------|-----------------------|----------------------------------------------------|---------------------------------|-------------------------------|-----------------------------------------------------------|
| <b>No any expansion<br/>(5)</b>                   | -0.145***<br>(0.020) | -0.047***<br>(0.012)       | -0.048***<br>(0.013)               | -0.053**<br>(0.020)   | -0.029***<br>(0.009)                               | -0.999***<br>(0.346)            | -1.010***<br>(0.261)          | -0.869***<br>(0.306)                                      |
| <b>Pre-treatment Mean in<br/>Expansion States</b> | 0.414<br>(0.493)     | 0.361<br>(0.48)            | 0.38<br>(0.485)                    | 0.427<br>(0.495)      | 0.416<br>(0.493)                                   | 9.064<br>(11.709)               | 9.043<br>(11.476)             | 7.601<br>(11.083)                                         |
| <b>Sample size</b>                                | 63,356               | 63,398                     | 63,432                             | 62,524                | 63,345                                             | 61,737                          | 61,932                        | 62,183                                                    |
| <b>Wisconsin as a<br/>treatment<br/>(6)</b>       | -0.094***<br>(0.018) | -0.032***<br>(0.012)       | -0.039***<br>(0.013)               | -0.031**<br>(0.014)   | -0.030***<br>(0.008)                               | -0.453<br>(0.314)               | -0.845***<br>(0.247)          | -0.760***<br>(0.244)                                      |
| <b>Pre-treatment Mean in<br/>Expansion States</b> | 0.385<br>(0.487)     | 0.379<br>(0.485)           | 0.35<br>(0.477)                    | 0.427<br>(0.495)      | 0.385<br>(0.487)                                   | 8.043<br>(11.154)               | 8.275<br>(11.005)             | 6.819<br>(10.584)                                         |
| <b>Sample size</b>                                | 86,808               | 86,865                     | 86,918                             | 85,769                | 86,821                                             | 84,727                          | 84,974                        | 85,314                                                    |
| <b>Drop Montana &amp;<br/>Louisiana<br/>(7)</b>   | -0.089***<br>(0.018) | -0.031**<br>(0.012)        | -0.038***<br>(0.013)               | -0.036**<br>(0.014)   | -0.025**<br>(0.009)                                | -0.483<br>(0.335)               | -0.808***<br>(0.254)          | -0.657**<br>(0.266)                                       |
| <b>Pre-treatment Mean in<br/>Expansion States</b> | 0.382<br>(0.486)     | 0.382<br>(0.486)           | 0.347<br>(0.476)                   | 0.431<br>(0.495)      | 0.382<br>(0.486)                                   | 7.982<br>(11.12)                | 8.228<br>(10.977)             | 6.739<br>(10.527)                                         |
| <b>Sample size</b>                                | 83,578               | 83,631                     | 83,684                             | 82,589                | 83,587                                             | 81,560                          | 81,809                        | 82,139                                                    |

Notes. Shaded panel 1 to 7 displays marginal effects and standard errors are in parentheses. All regressions control for age, gender, race, education, marital status, employment status, chronic diseases status, tobacco use, state-fixed effects, and quarter/year-fixed effects, as well as controlling for state-year variables including the number of hospital beds and physicians per 1,000 population, unemployment rate, per capita income, racial/ethnic composition, and Senate voting records. Panel 1 shows baseline model using 32 states as an expansion states, 19 states as a non-expansion states (See Appendix 1). Panel 2 shows estimates after excluding full expansion states (DC, DE, MA, NY, VT). Panel 3 shows estimates after excluding partial expansion states (CA, CT, HI, MN). Panel 4 shows estimates after excluding both full and partial expansion states (DC, DE, MA, NY, VT, CA, CT, HI, MN). Panel 5 shows estimates after excluding any state with prior-expansion experience (DC, DE, MA, NY, VT, CA, CT, HI, MN, CO, IA, NJ, WA). Panel 6 shows estimates after switching Wisconsin into an expansion state from baseline model. Panel 7 shows estimates after excluding late expanders in 2016, Montana and Louisiana. Pre-treatment means are the weighted means of outcomes before ACA Medicaid expansion was implemented in expansion states and standard deviations are in parentheses. \*\*\*p<0.01; \*\*p<0.05; \*p<0.1.

Table A16. Effects of the ACA Medicaid expansion on the changes in outcomes for childless adults by income

|                                                                     | Uninsured            | No usual<br>Source of care | Unmet care<br>needs due<br>to cost | No annual<br>check-up | Self-<br>reported<br>Fair or poor<br>health status | Poor<br>physical<br>health days | Poor<br>mental<br>health days | Days with<br>health-<br>related<br>activity<br>limitation |
|---------------------------------------------------------------------|----------------------|----------------------------|------------------------------------|-----------------------|----------------------------------------------------|---------------------------------|-------------------------------|-----------------------------------------------------------|
| <b>Income less than<br/>100% FPL(Baseline)<br/>(1)</b>              | -0.093***<br>(0.018) | -0.034***<br>(0.012)       | -0.038***<br>(0.013)               | -0.034**<br>(0.014)   | -0.025***<br>(0.009)                               | -0.442<br>(0.321)               | -0.779***<br>(0.244)          | -0.647**<br>(0.251)                                       |
| <b>Pre-treatment Mean<br/>and standard<br/>deviation of Outcome</b> | 0.385<br>(0.487)     | 0.381<br>(0.486)           | 0.35<br>(0.477)                    | 0.428<br>(0.495)      | 0.385<br>(0.487)                                   | 8.035<br>(11.15)                | 8.265<br>(11.004)             | 6.802<br>(10.57)                                          |
| <b>Sample size</b>                                                  | 86,808               | 86,865                     | 86,918                             | 85,769                | 86,821                                             | 84,727                          | 84,974                        | 85,314                                                    |
| <b>Income less than<br/>138% FPL<br/>(2)</b>                        | -0.077***<br>(0.014) | -0.032***<br>(0.009)       | -0.035***<br>(0.010)               | -0.032***<br>(0.010)  | -0.011*<br>(0.006)                                 | -0.131<br>(0.211)               | -0.637***<br>(0.167)          | -0.425***<br>(0.131)                                      |
| <b>Pre-treatment Mean<br/>and standard<br/>deviation of Outcome</b> | 0.385<br>(0.487)     | 0.369<br>(0.483)           | 0.342<br>(0.474)                   | 0.427<br>(0.495)      | 0.359<br>(0.48)                                    | 7.48<br>(10.903)                | 7.592<br>(10.687)             | 6.069<br>(10.132)                                         |
| <b>Sample size</b>                                                  | 160,479              | 160,542                    | 160,614                            | 158,670               | 160,477                                            | 156,946                         | 157,444                       | 158,038                                                   |

Notes. Shaded panel 1 and 2 displays marginal effects and standard errors are in parentheses. All regressions control for age, gender, race, education, marital status, employment status, chronic diseases status, tobacco use, state-fixed effects, and quarter/year-fixed effects, as well as controlling for state-year variables including the number of hospital beds and physicians per 1,000 population, unemployment rate, per capita income, racial/ethnic composition, and Senate voting records. Panel 1 shows baseline model using childless adults with income below 100 % FPL. Panel 2 shows estimates using childless adults with income at or below 138 % FPL. Pre-treatment means are the weighted means of outcomes before ACA Medicaid expansion was implemented in expansion states and standard deviations are in parentheses. \*\*\*p<0.01; \*\*p<0.05; \*p<0.1.

Table A17. Comparison between stratified models with difference-in-difference-in-differences in estimated effects of the ACA Medicaid expansion on disparities in outcomes among poor childless Whites, Blacks, and Hispanics

|                              |                       | No insurance      | No usual Source of care | Unmet care needs due to cost | No annual check-up | Fair or poor health status | Poor physical health days | Poor mental health days | Days with health-related activity limitation |
|------------------------------|-----------------------|-------------------|-------------------------|------------------------------|--------------------|----------------------------|---------------------------|-------------------------|----------------------------------------------|
| <b>Stratified DD Model</b>   | Blacks- Whites (1)    | -0.029<br>(0.038) | 0.026<br>(0.022)        | -0.017<br>(0.035)            | 0.021<br>(0.04)    | -0.019<br>(0.041)          | -0.201<br>(0.612)         | -0.824<br>(0.599)       | -0.504<br>(0.499)                            |
|                              | Hispanics- Whites (2) | 0.037<br>(0.037)  | 0.018<br>(0.027)        | 0.019<br>(0.027)             | 0.007<br>(0.043)   | -0.044*<br>(0.027)         | 0.441<br>(0.668)          | 0.013<br>(1.005)        | -0.538<br>(0.911)                            |
| <b>DDD Model</b>             | Blacks- Whites (3)    | -0.024<br>(0.023) | 0.002<br>(0.025)        | -0.022<br>(0.020)            | -0.002<br>(0.025)  | -0.004<br>(0.031)          | 0.153<br>(0.495)          | -0.203<br>(0.516)       | 0.131<br>(0.456)                             |
|                              | Hispanics- Whites (4) | 0.036<br>(0.051)  | -0.028<br>(0.030)       | 0.042<br>(0.026)             | 0.012<br>(0.021)   | 0.073**<br>(0.035)         | 2.106***<br>(0.730)       | 0.874*<br>(0.447)       | 1.412**<br>(0.586)                           |
| <b>Sample size (overall)</b> |                       | 86,808            | 86,865                  | 86,918                       | 85,769             | 86,821                     | 84,727                    | 84,974                  | 85,314                                       |

Notes: Panel 1 to 4 displays marginal effects and standard errors are in parentheses. All regressions control for age, gender, race, education, marital status, employment status, chronic diseases status, tobacco use, state-fixed effects, and quarter/year-fixed effects. We also control for state-year variables including the number of hospital beds and physicians per 1,000 population, unemployment rate, per capita income, racial/ethnic composition, and Senate voting records.

\*\*\*p<0.01; \*\*p<0.05; \*p<0.1.

# Appendix 8. Falsification Test

Table A18. Effects of the ACA Medicaid expansion on the changes in outcomes for poor childless elderly and high income childless adults

|                                                                     | Uninsured         | No usual<br>Source of care | Unmet care<br>needs due<br>to cost | No annual<br>check-up | Self-<br>reported<br>Fair or poor<br>health status | Poor<br>physical<br>health days | Poor<br>mental<br>health days | Days with<br>health-<br>related<br>activity<br>limitation |
|---------------------------------------------------------------------|-------------------|----------------------------|------------------------------------|-----------------------|----------------------------------------------------|---------------------------------|-------------------------------|-----------------------------------------------------------|
| <b>Low-income adults<br/>older than 65<br/>(1)</b>                  | 0.004<br>(0.007)  | -0.022**<br>(0.010)        | -0.007<br>(0.016)                  | 0.006<br>(0.012)      | -0.010<br>(0.019)                                  | -0.370<br>(0.335)               | 0.501<br>(0.364)              | 0.227<br>(0.364)                                          |
| <b>Pre-treatment Mean<br/>and standard<br/>deviation of Outcome</b> | 0.04<br>(0.196)   | 0.103<br>(0.303)           | 0.124<br>(0.33)                    | 0.162<br>(0.368)      | 0.508<br>(0.5)                                     | 9.182<br>(11.587)               | 4.676<br>(9.019)              | 5.305<br>(9.873)                                          |
| <b>Sample size</b>                                                  | 40,483            | 40,412                     | 40,355                             | 39,750                | 40,271                                             | 38,213                          | 38,955                        | 39,133                                                    |
| <b>High-income adults<br/>aged 19 to 64<br/>(2)</b>                 | 0.007*<br>(0.004) | 0.001<br>(0.006)           | 0.003<br>(0.005)                   | -0.004<br>(0.005)     | 0.001<br>(0.003)                                   | 0.040<br>(0.076)                | 0.036<br>(0.099)              | 0.048<br>(0.036)                                          |
| <b>Pre-treatment Mean<br/>and standard<br/>deviation of Outcome</b> | 0.062<br>(0.241)  | 0.155<br>(0.362)           | 0.065<br>(0.247)                   | 0.309<br>(0.462)      | 0.078<br>(0.269)                                   | 2.467<br>(6.438)                | 2.738<br>(6.453)              | 1.46<br>(4.97)                                            |
| <b>Sample size</b>                                                  | 414,558           | 414,232                    | 414,556                            | 412,392               | 414,261                                            | 412,137                         | 412,109                       | 413,641                                                   |

Notes. Shaded panel 1 to 2 displays marginal effects and standard errors are in parentheses. All regressions control for age, gender, race, education, marital status, employment status, chronic diseases status, tobacco use, state-fixed effects, and quarter/year-fixed effects, as well as controlling for state-year variables including the number of hospital beds and physicians per 1,000 population, unemployment rate, per capita income, racial/ethnic composition, and Senate voting records. Panel 1 shows estimates using childless adults older than 65-year-old with income below 100 % FPL. Panel 2 shows estimates using childless adults with income more than 400 % FPL. Pre-treatment means are the weighted means of outcomes before ACA Medicaid expansion was implemented in expansion states and standard deviations are in parentheses. \*\*\*p<0.01; \*\*p<0.05; \*p<0.1.
